# Supplementary material for: Triterpenes and Pheophorbides from Camellia ptilosperma and Their Cytotoxicity, Photocytotoxicity, and Photodynamic Antibacterial Activity
Source: MDPI journal article supplement (doi:10.3390/molecules28207058), 2023-10-12
Supplement: s1 [file s1]

## Supplementary Material

# **Triterpenes and Pheophorbides from *Camellia ptilosperma* and their Cytotoxicity, Photocytotoxicity, and Photodynamic Antibacterial Activity**

Siyuan Ma <sup>1†</sup>, Mengling Weng <sup>2†</sup>, Ting Yang <sup>3</sup>, Li Ge <sup>4,\*</sup> and Kedi Yang <sup>1,4,\*</sup>

<sup>1</sup> School of Chemistry & Chemical Engineering, Guangxi University, Nanning 530004, China

<sup>2</sup> Key Laboratory of Sugarcane Biotechnology and Genetic Improvement (Guangxi), Ministry of Agriculture & Rural Affairs, Guangxi Key Laboratory of Sugarcane Genetic Improvement, Sugarcane Research Institute, Guangxi Academy of Agricultural Sciences, Nanning 530004, China

<sup>3</sup> Guangxi Fangcheng Golden Camellia National Nature Reserve Management Center, Fangchenggang 538021, China

<sup>4</sup> Medical College, Guangxi University, Nanning 530004, PR China

\* Correspondences: geli\_2009@163.com (L. Ge), kdyang@163.com (K.D. Yang); Tel.: +86-771-3949953 (K.D. Yang)

† These authors contributed equally to this work.

## CONTENTS

|                                                     |    |
|-----------------------------------------------------|----|
| 1. Spectroscopic data for compound <b>1</b> .....   | 1  |
| 2. Spectroscopic data for compound <b>2</b> .....   | 5  |
| 3. Spectroscopic data for compound <b>3</b> .....   | 9  |
| 4. Spectroscopic data for compound <b>4</b> .....   | 13 |
| 5. Spectroscopic data for compound <b>5</b> .....   | 17 |
| 6. Spectroscopic data for compound <b>6</b> .....   | 21 |
| 7. Spectroscopic data for compound <b>7</b> .....   | 25 |
| 8. Spectroscopic data for compound <b>8</b> .....   | 29 |
| 9. Spectroscopic data for compound <b>9</b> .....   | 33 |
| 10. Spectroscopic data for compound <b>10</b> ..... | 37 |
| 11. The scheme of extraction and isolation.....     | 41 |

## 1. Spectroscopic data for compound 1

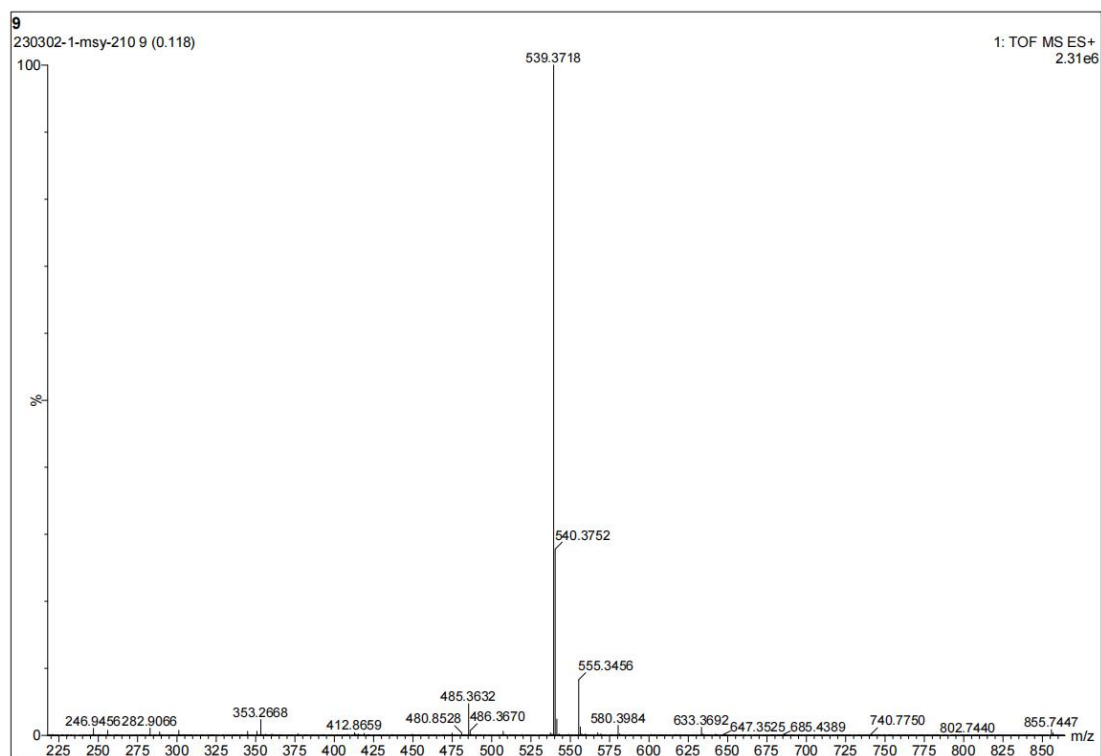

Figure S1-1. The HR-ESI-MS of compound 1.

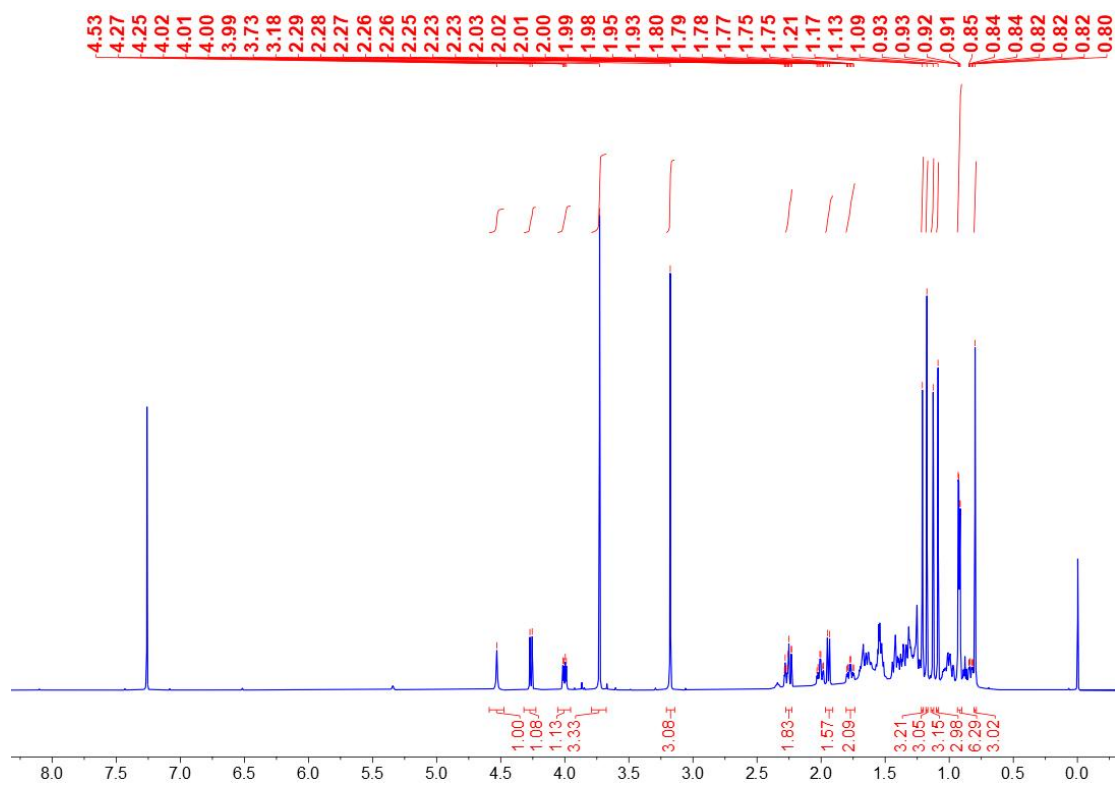

Figure S1-2. The  $^1\text{H}$  NMR spectrum of compound 1 (600 MHz,  $\text{CDCl}_3$ ).

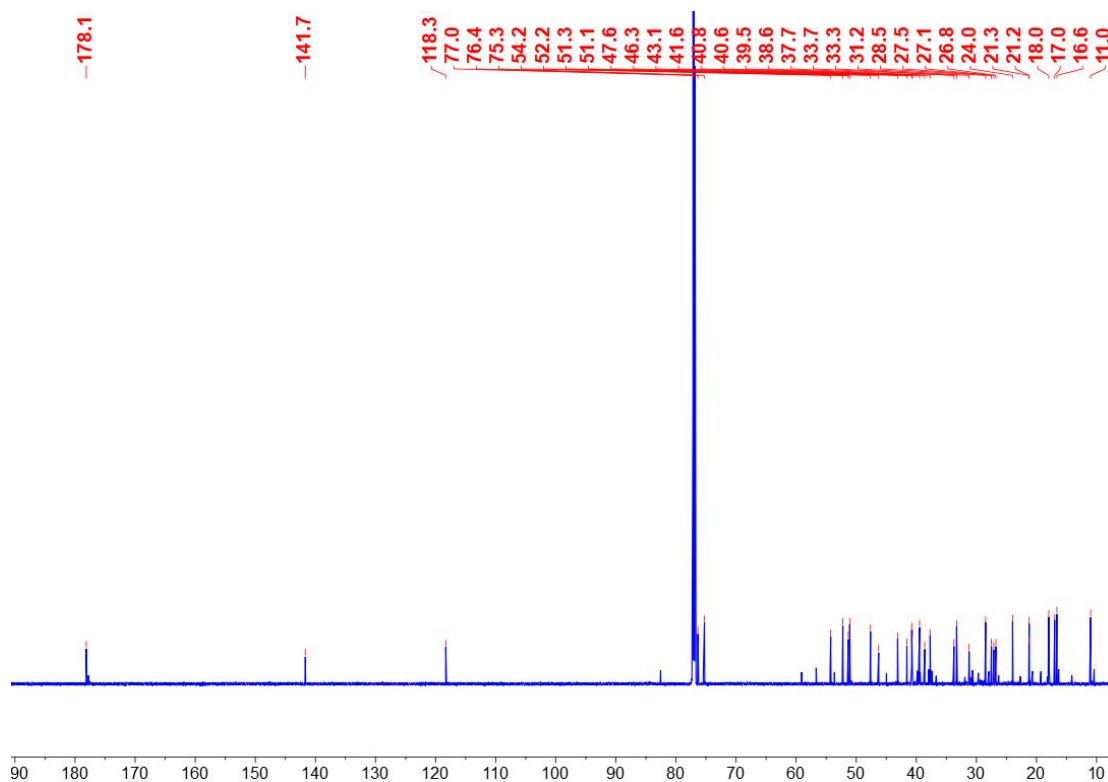

**Figure S1-3.** The  $^{13}\text{C}$  NMR spectrum of compound **1** (151 MHz,  $\text{CDCl}_3$ ).

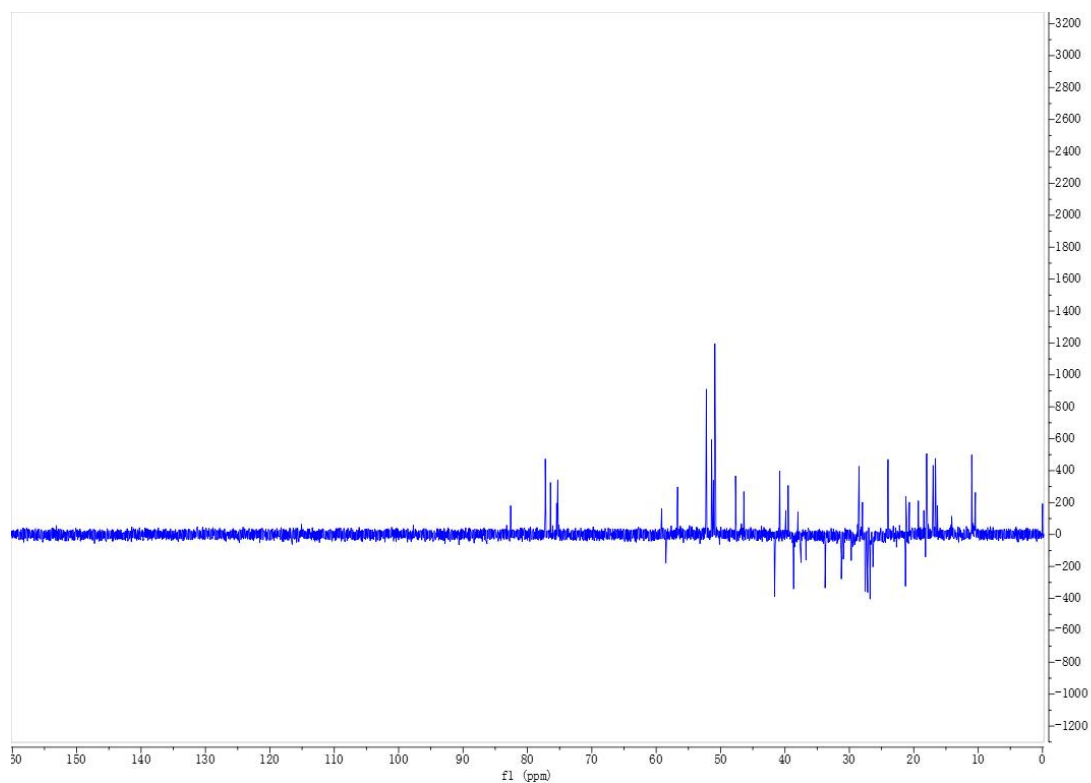

**Figure S1-4.** The DEPT 135 spectrum of compound **1** (151 MHz,  $\text{CDCl}_3$ ).

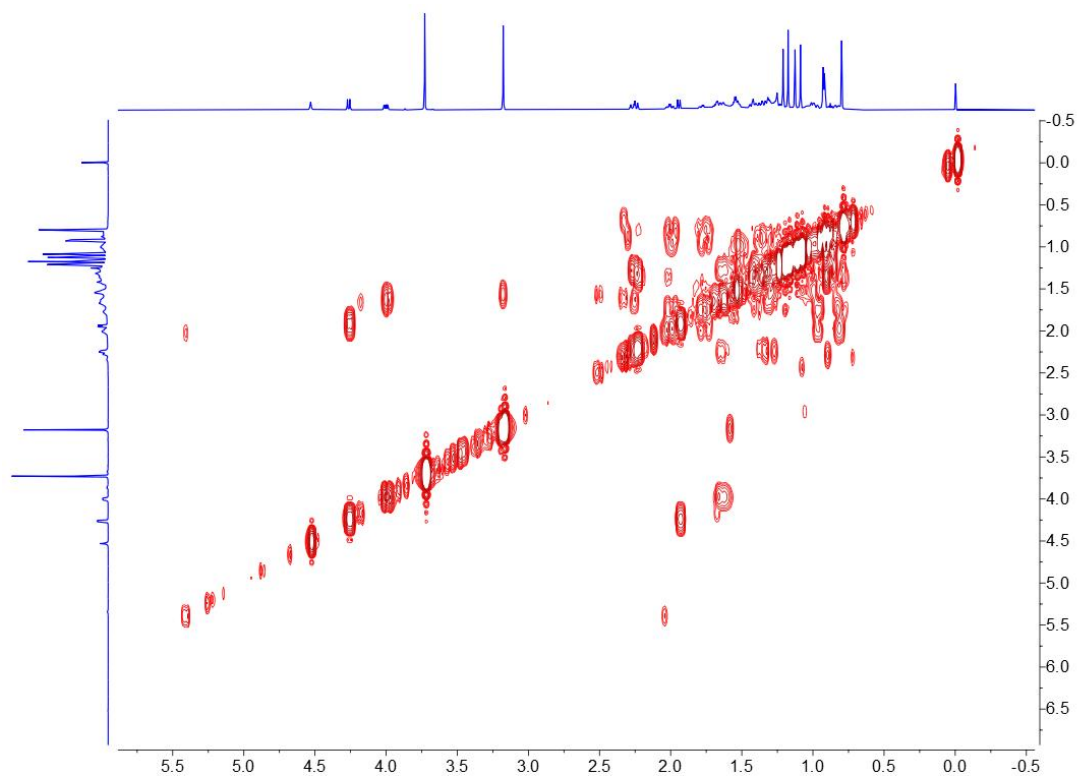

**Figure S1-5.** The  $^1\text{H}$ - $^1\text{H}$  COSY spectrum of compound **1** (600 MHz,  $\text{CDCl}_3$ ).

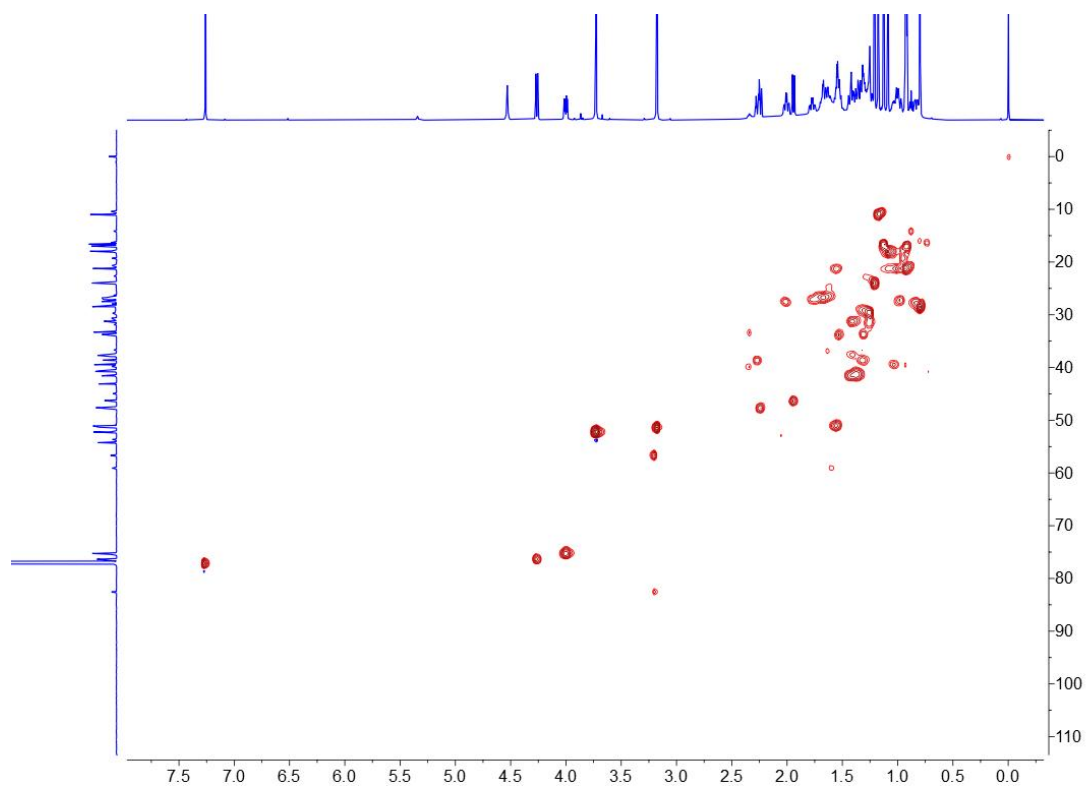

**Figure S1-6.** The HSQC spectrum of compound **1** (600/151 MHz,  $\text{CDCl}_3$ ).

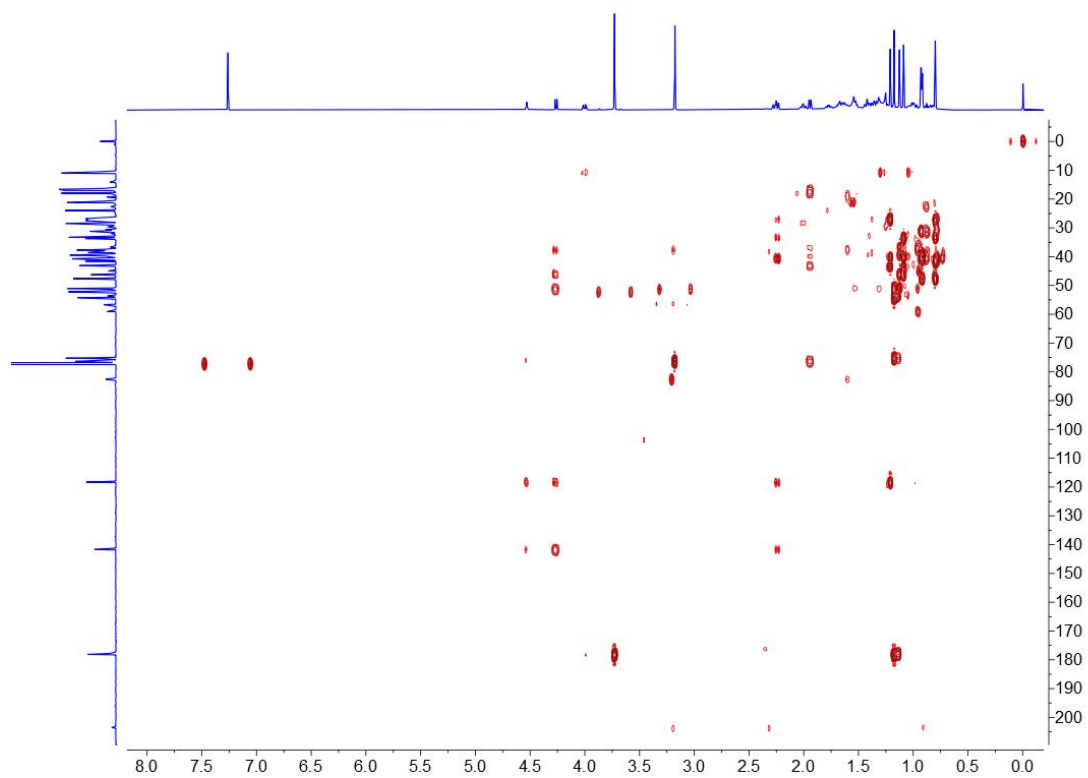

**Figure S1-7.** The HMBC spectrum of compound **1** (600/151 MHz, CDCl<sub>3</sub>).

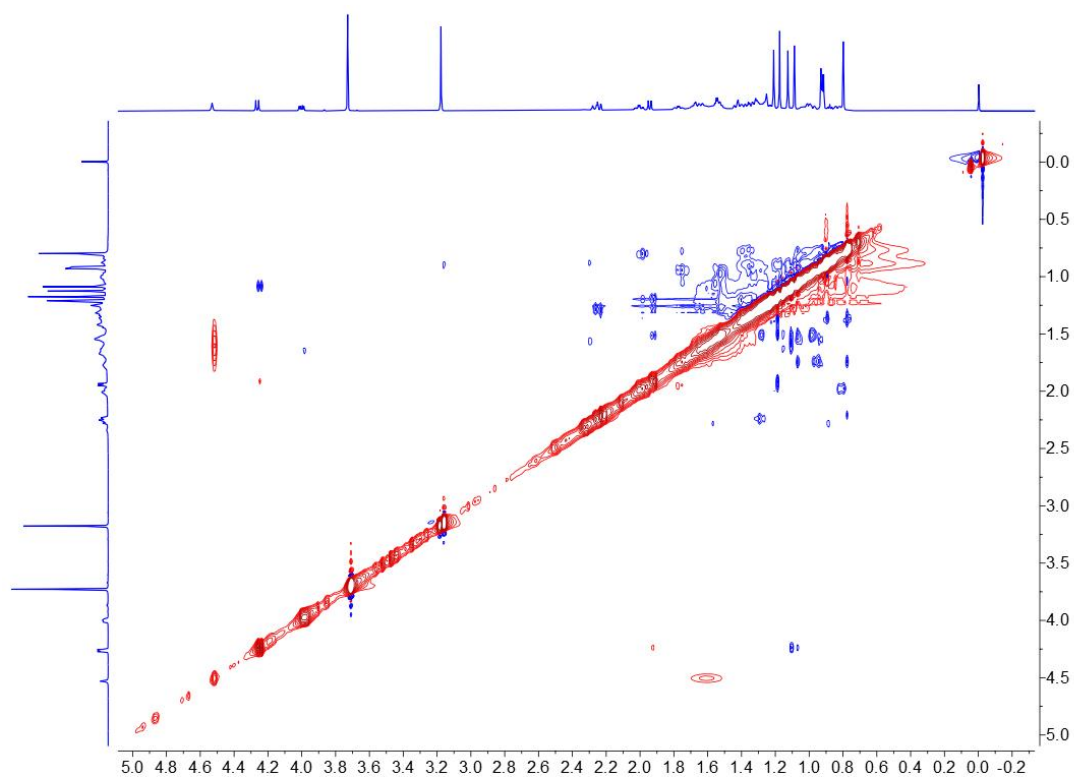

**Figure S1-8.** The NOESY spectrum of compound **1** (600 MHz, CDCl<sub>3</sub>).

## 2. Spectroscopic data for compound 2

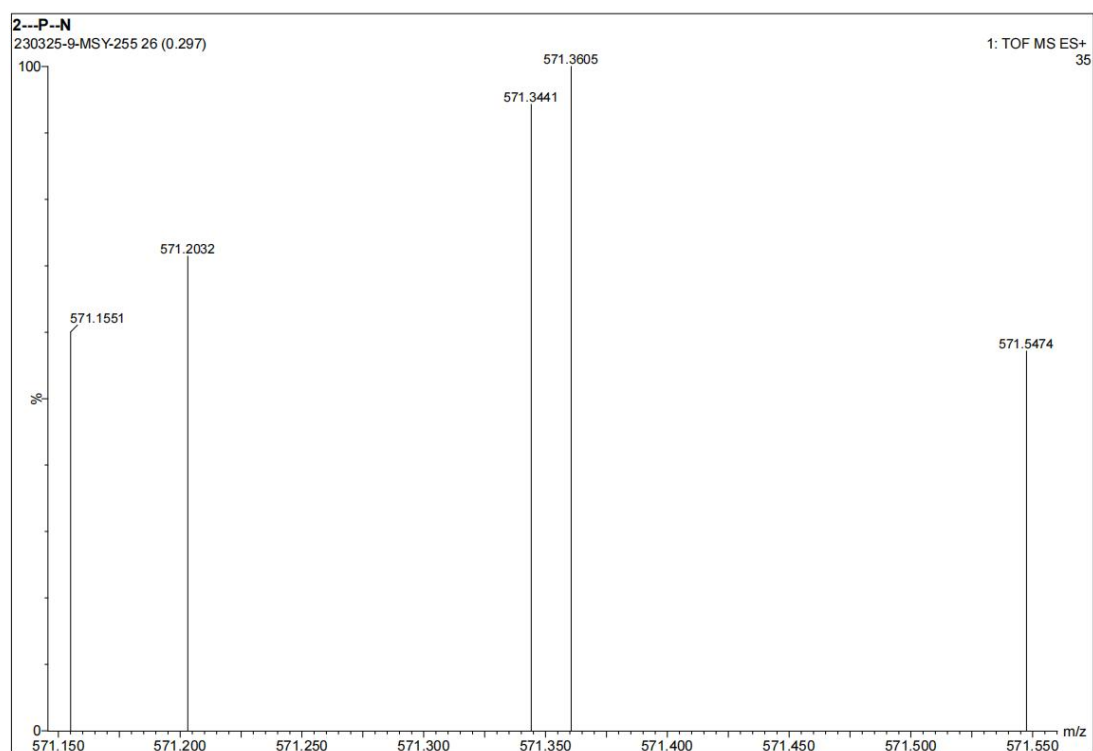

Figure S2-1. The HR-ESI-MS of compound 2.

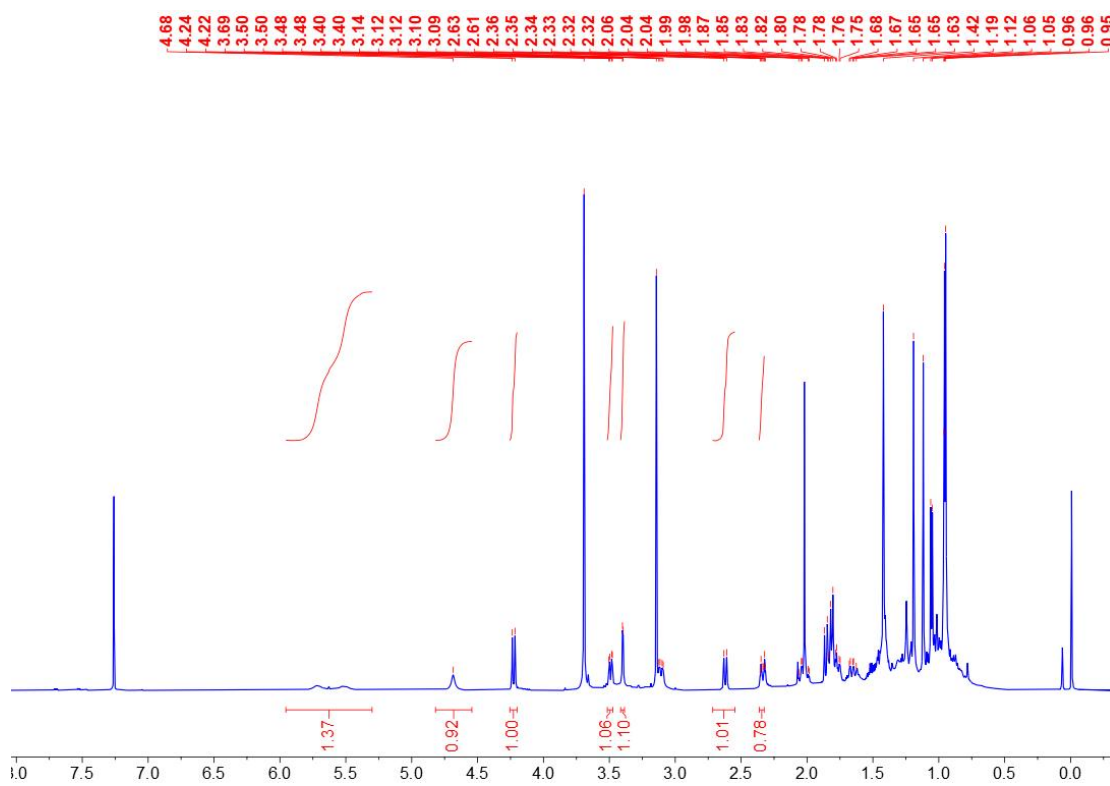

Figure S2-2. The  $^1\text{H}$  NMR spectrum of compound 2 (600 MHz,  $\text{CDCl}_3$ ).

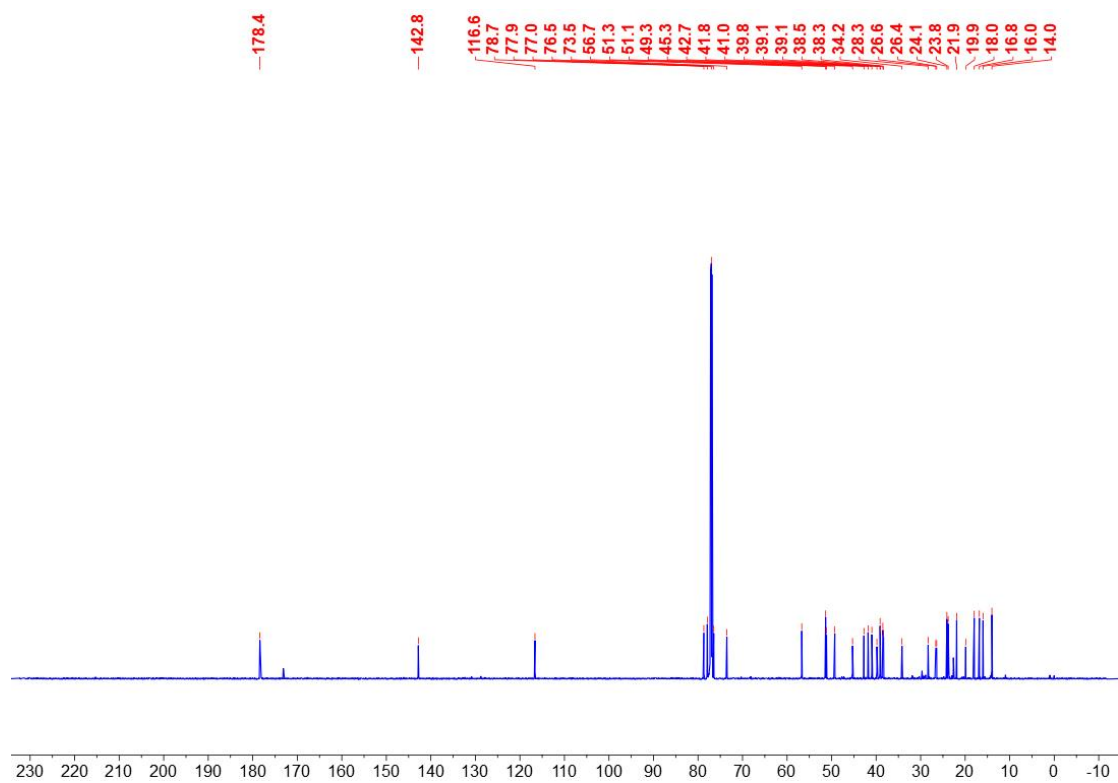

**Figure S2-3.** The  $^{13}\text{C}$  NMR spectrum of compound **2** (151 MHz,  $\text{CDCl}_3$ ).

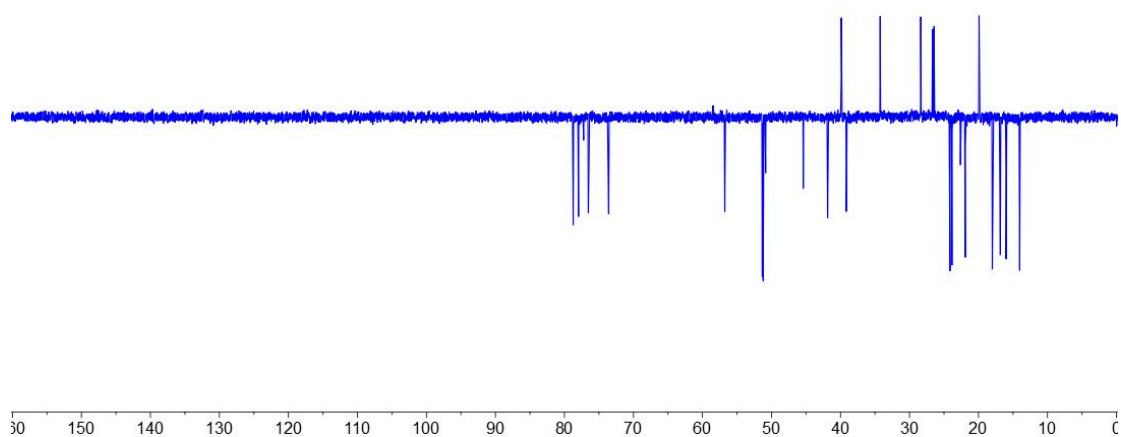

**Figure S2-4.** The DEPT 135 spectrum of compound **2** (151 MHz,  $\text{CDCl}_3$ ).



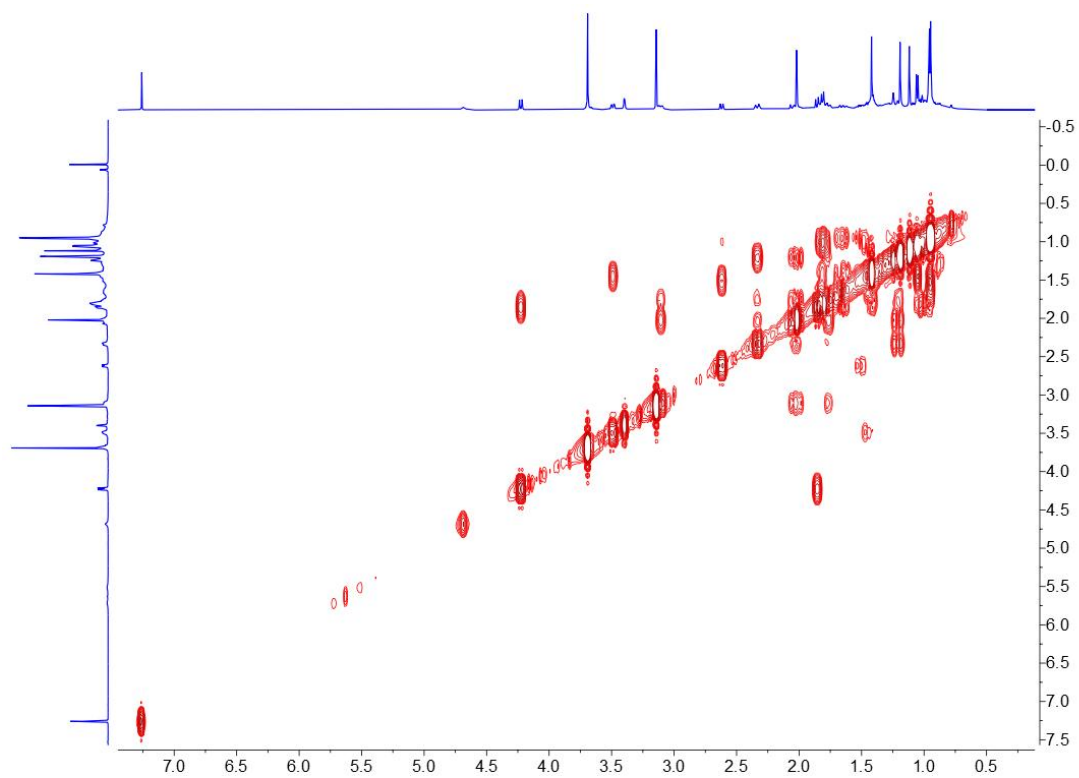

**Figure S2-5.** The  $^1\text{H}$ - $^1\text{H}$  COSY spectrum of compound **2** (600 MHz,  $\text{CDCl}_3$ ).

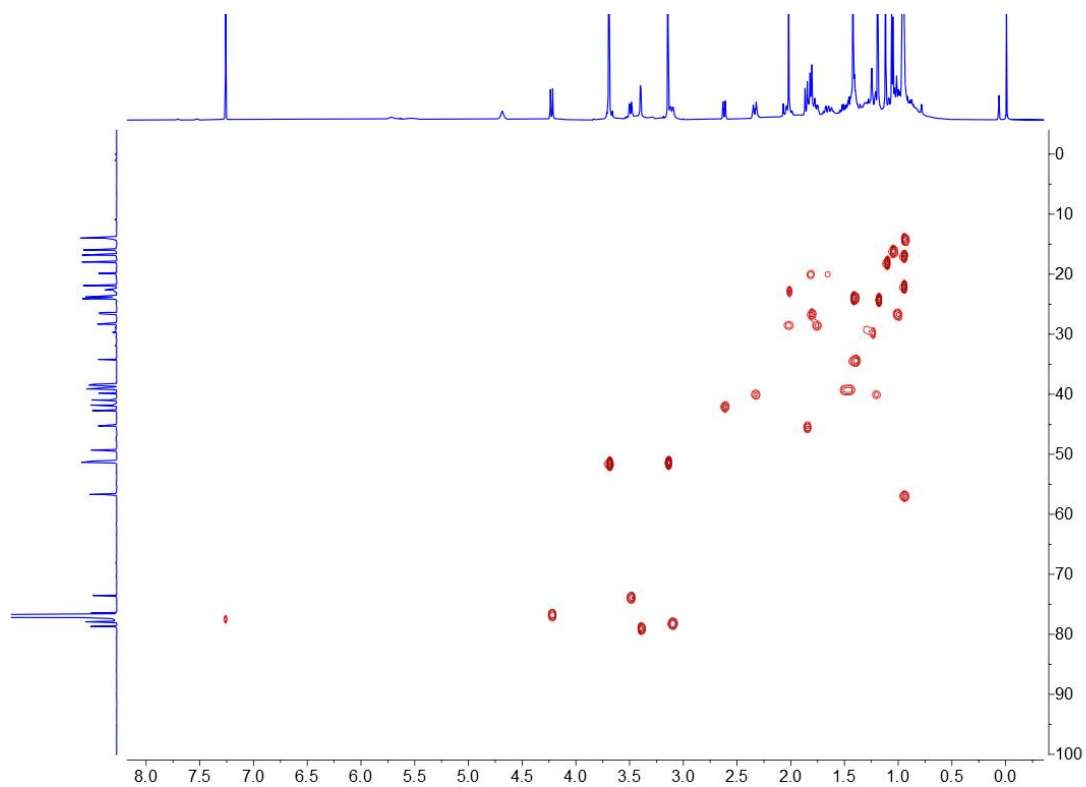

**Figure S2-6.** The HSQC spectrum of compound **2** (600/151 MHz,  $\text{CDCl}_3$ ).

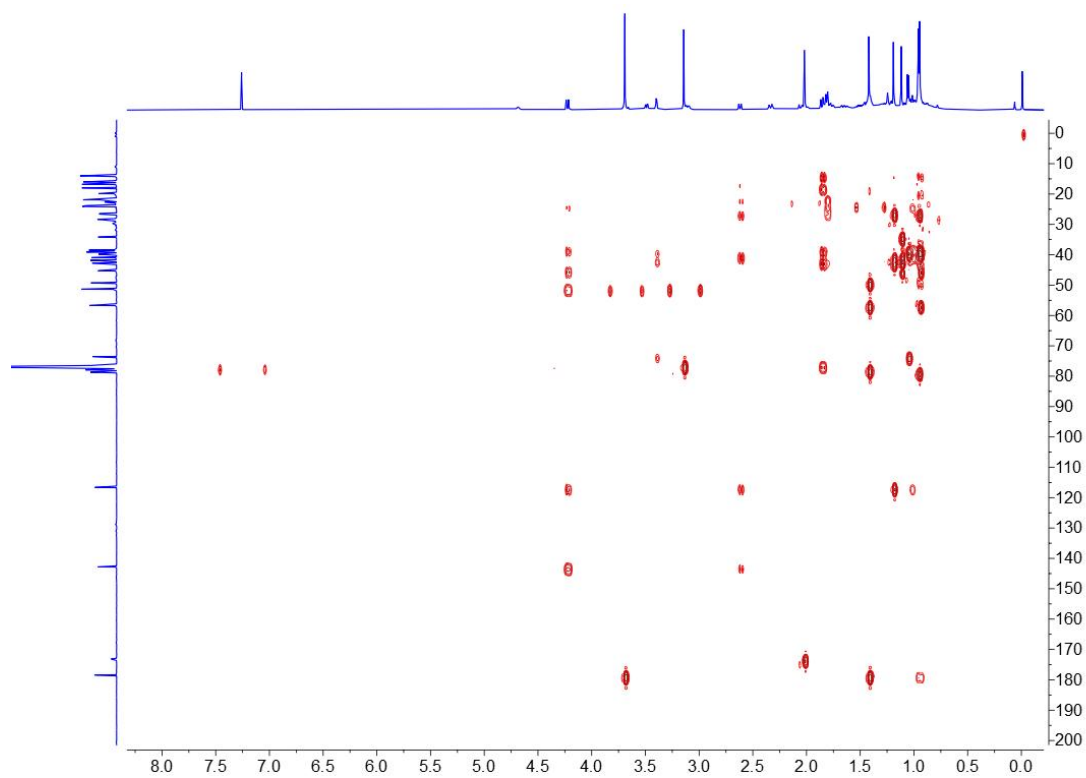

**Figure S2-7.** The HMBC spectrum of compound **2** (600/151 MHz,  $\text{CDCl}_3$ ).

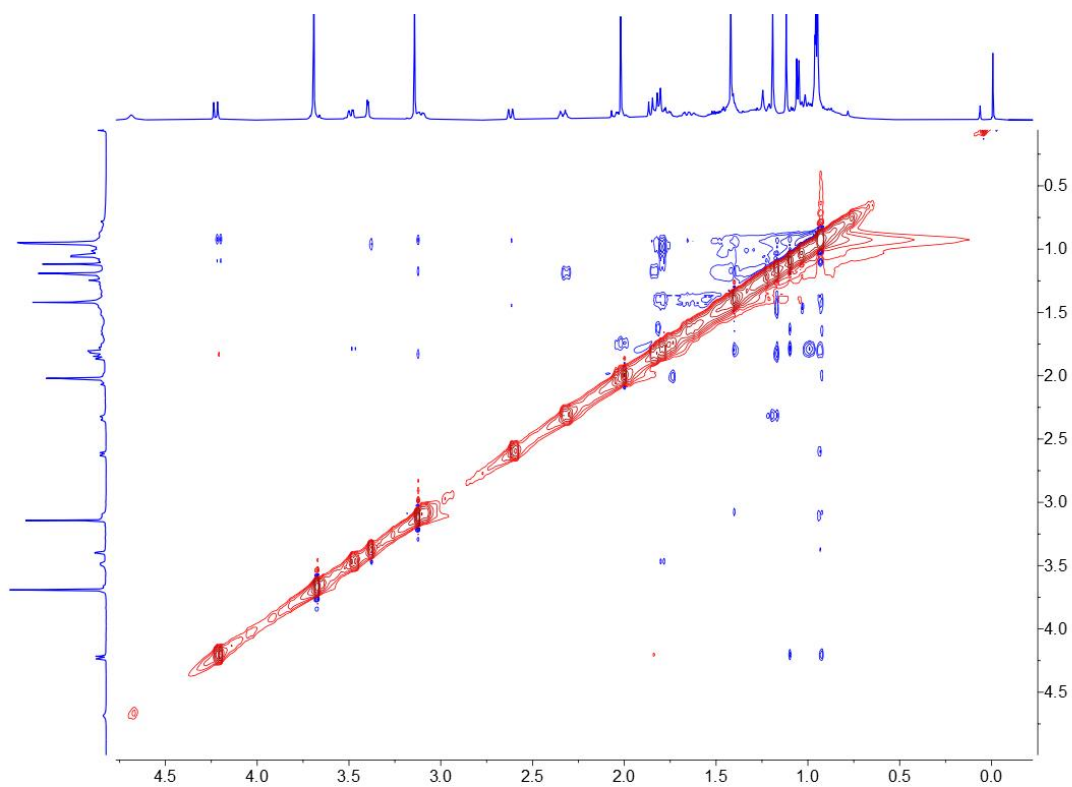

**Figure S2-8.** The NOESY spectrum of compound **2** (600 MHz,  $\text{CDCl}_3$ ).

### 3. Spectroscopic data for compound 3

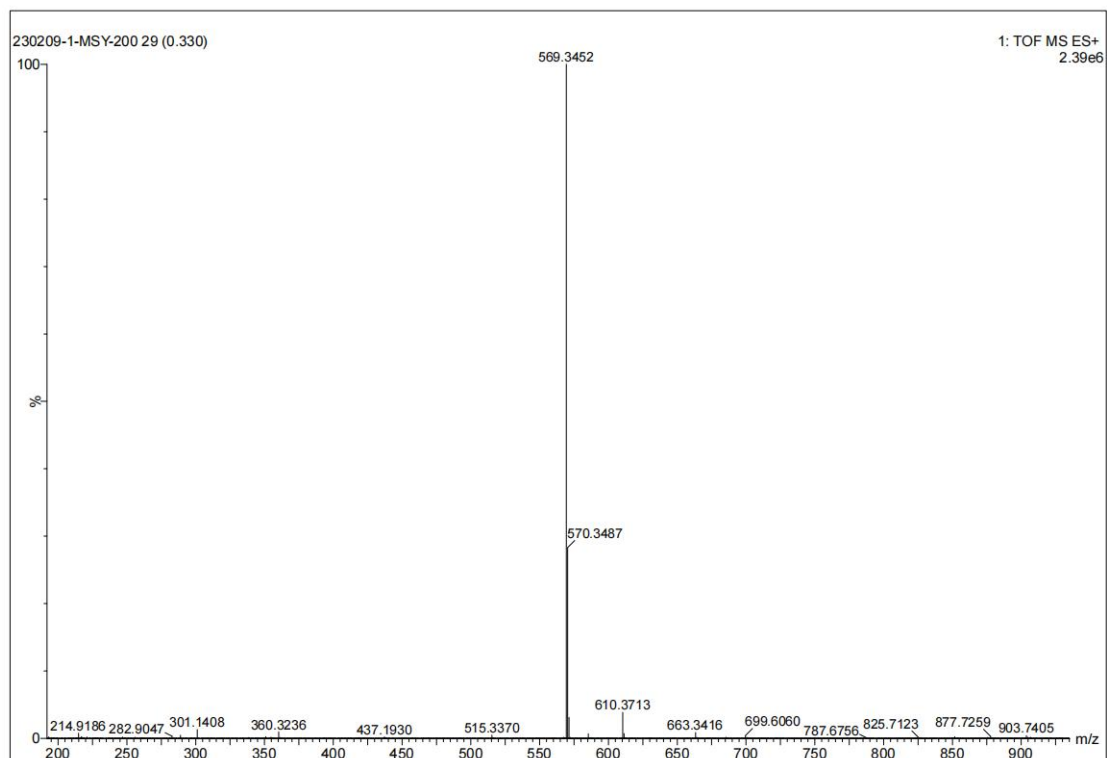

Figure S3-1. The HR-ESI-MS of compound 3.

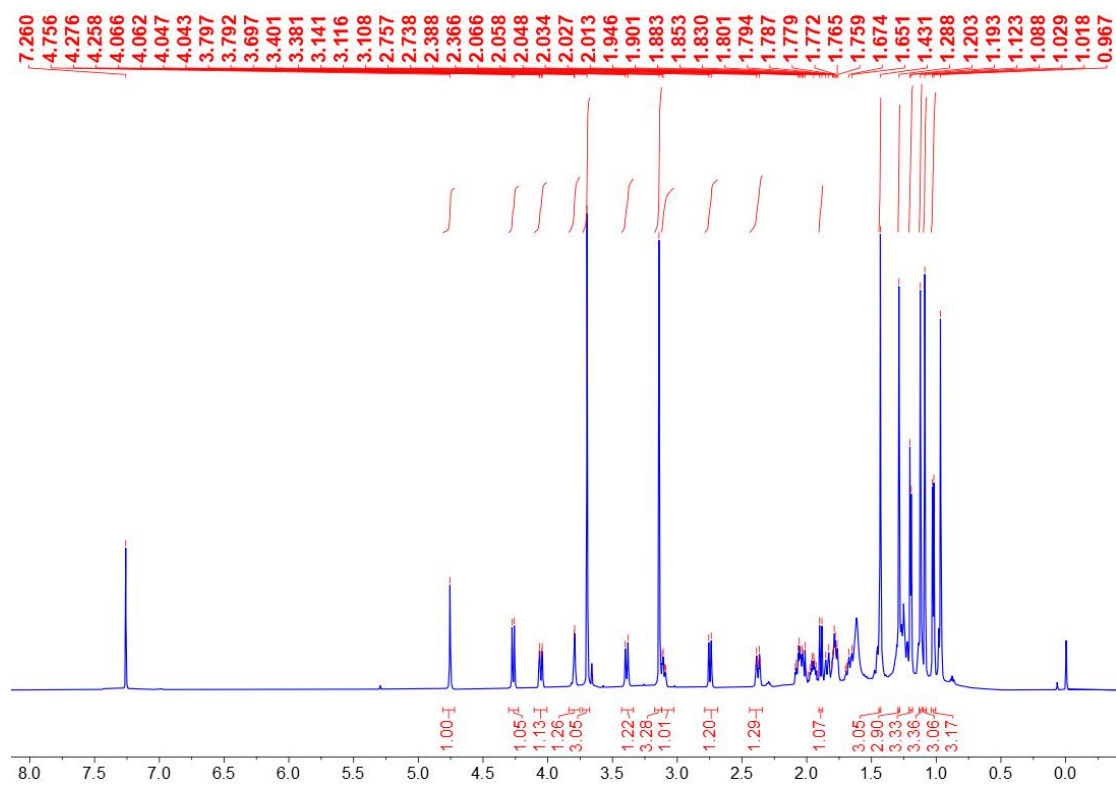

Figure S3-2. The  $^1\text{H}$  NMR spectrum of compound 3 (600 MHz,  $\text{CDCl}_3$ ).

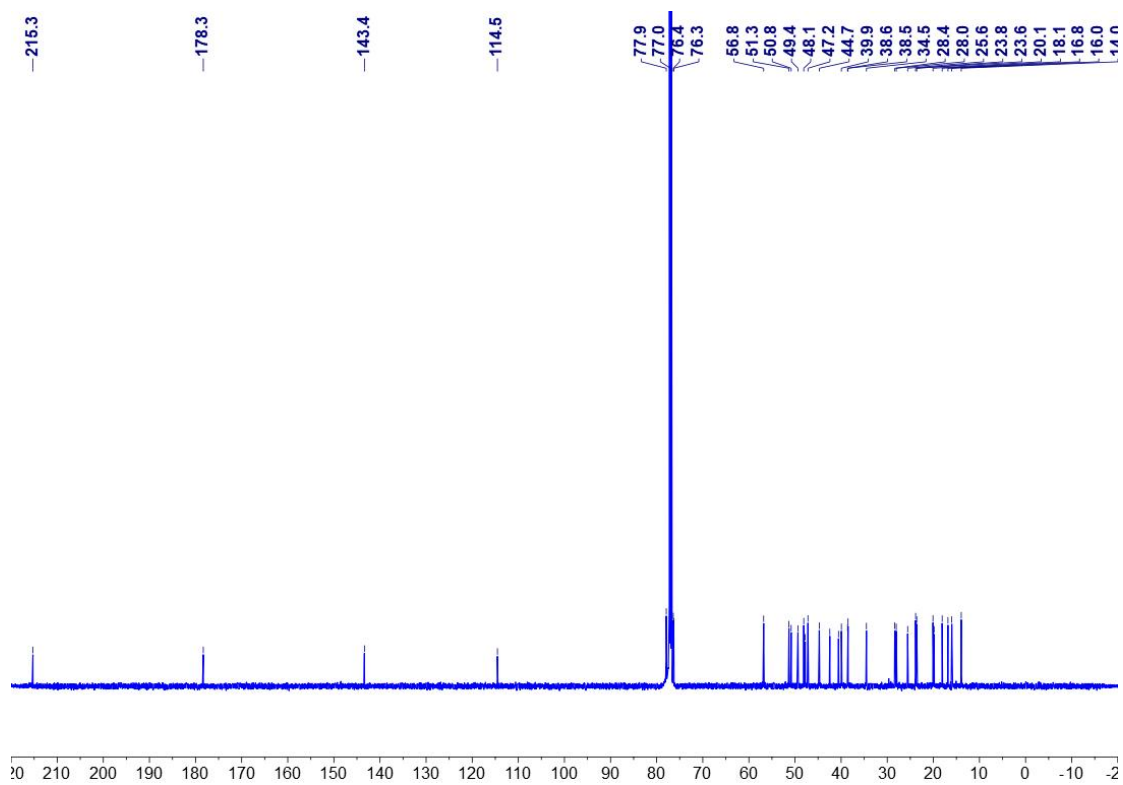

**Figure S3-3.** The  $^{13}\text{C}$  NMR spectrum of compound **3** (151 MHz,  $\text{CDCl}_3$ ).

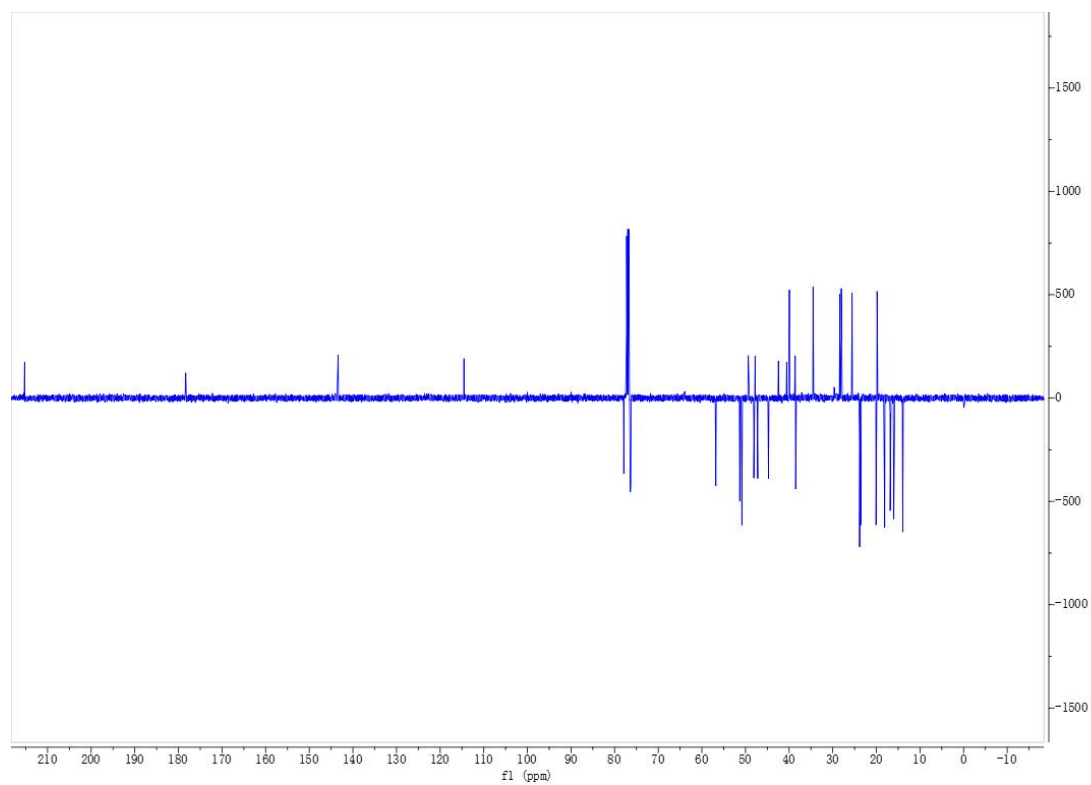

**Figure S3-4.** The DEPT 135 spectrum of compound **3** (151 MHz,  $\text{CDCl}_3$ ).

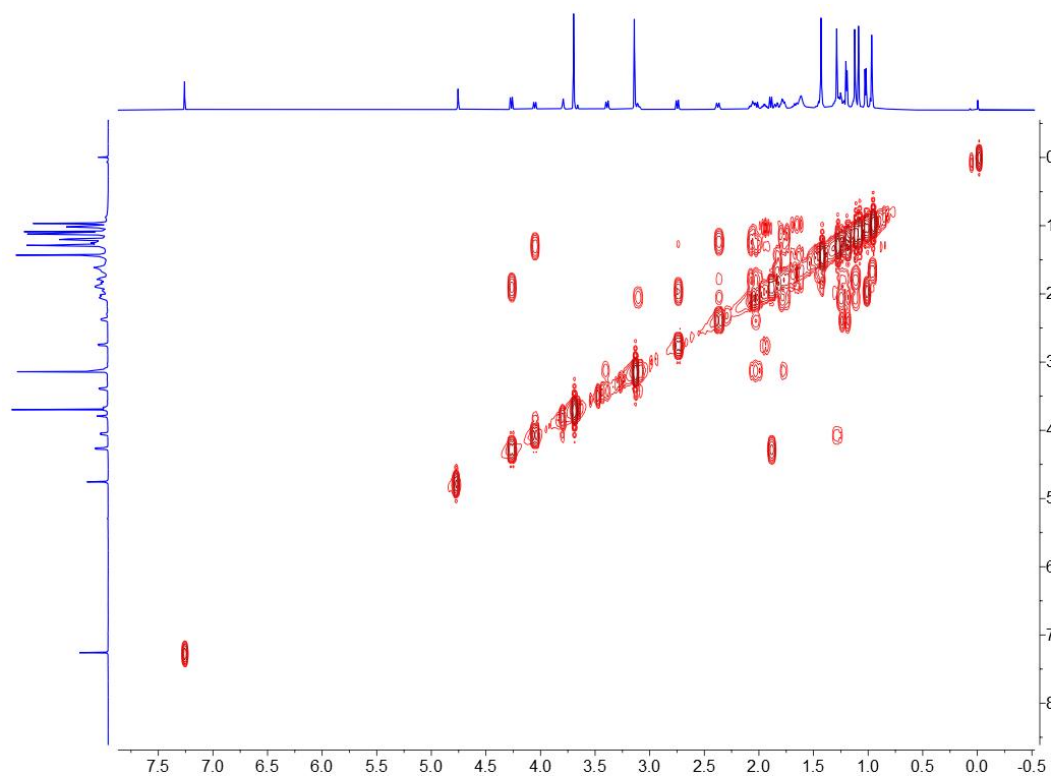

**Figure S3-5.** The  $^1\text{H}$ - $^1\text{H}$  COSY spectrum of compound **3** (600 MHz,  $\text{CDCl}_3$ ).

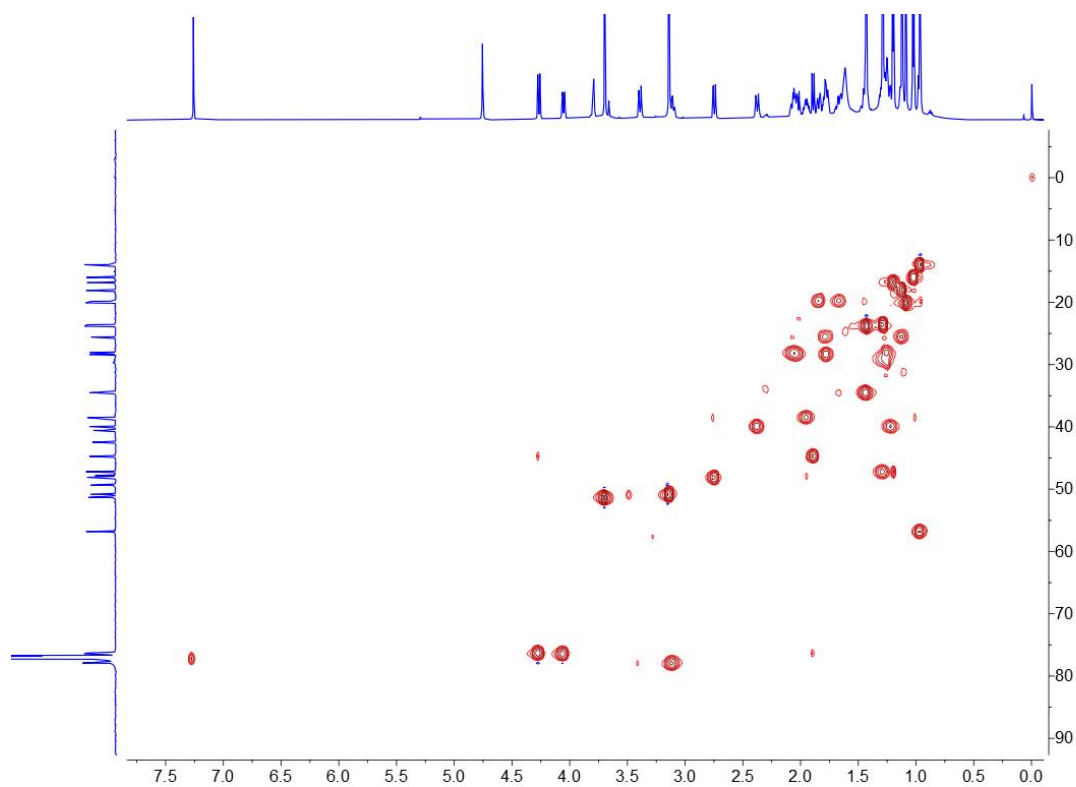

**Figure S3-6.** The HSQC spectrum of compound **3** (600/151 MHz,  $\text{CDCl}_3$ ).

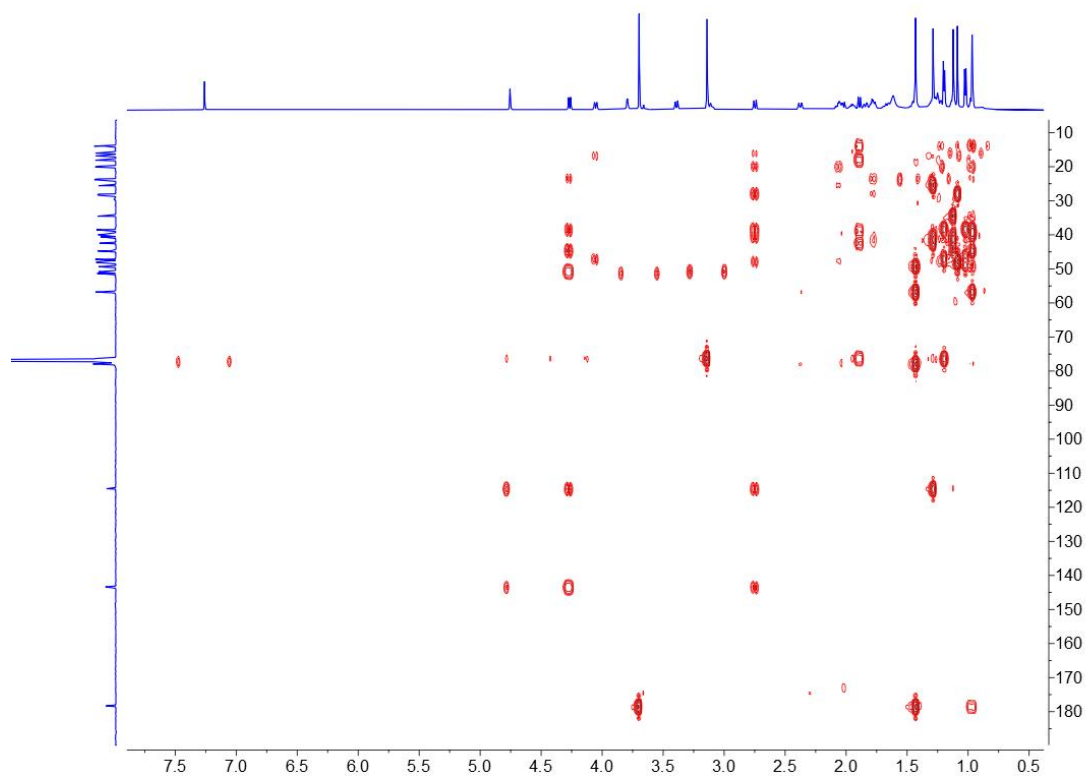

**Figure S3-7.** The HMBC spectrum of compound **3** (600/151 MHz,  $\text{CDCl}_3$ ).

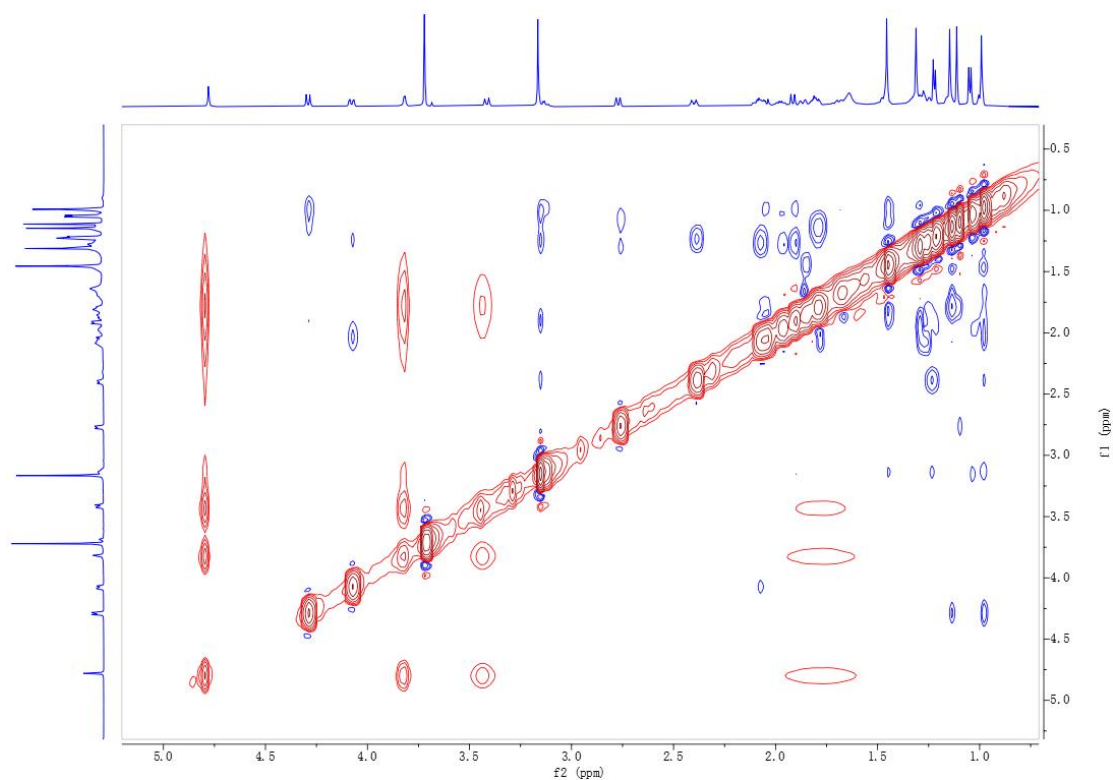

**Figure S3-8.** The NOESY spectrum of compound **3** (600 MHz,  $\text{CDCl}_3$ ).

#### 4. Spectroscopic data for compound 4

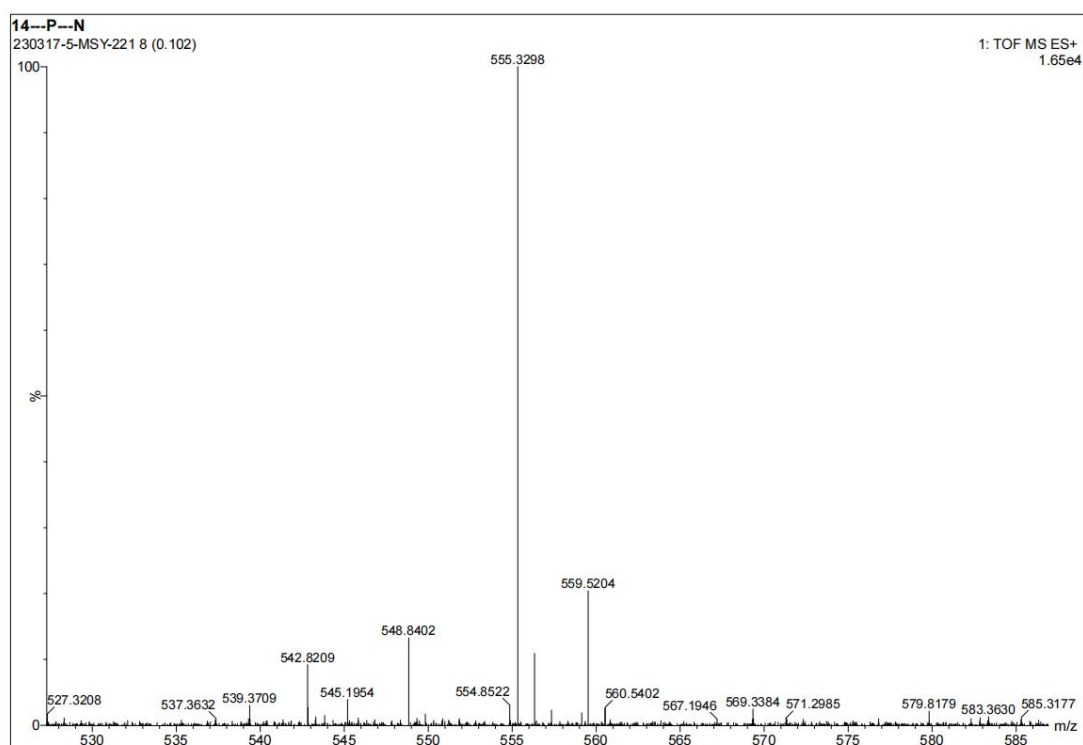

Figure S4-1. The HR-ESI-MS of compound 4.

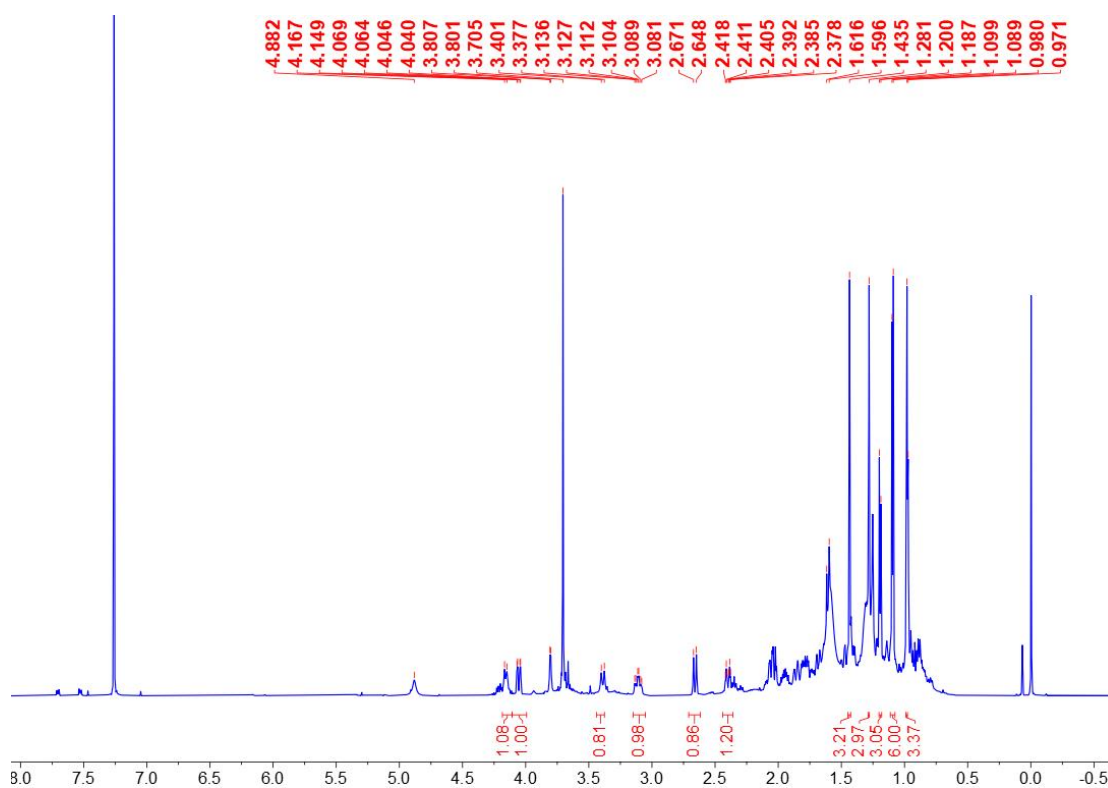

Figure S4-2. The  $^1\text{H}$  NMR spectrum of compound 4 (600 MHz,  $\text{CDCl}_3$ ).

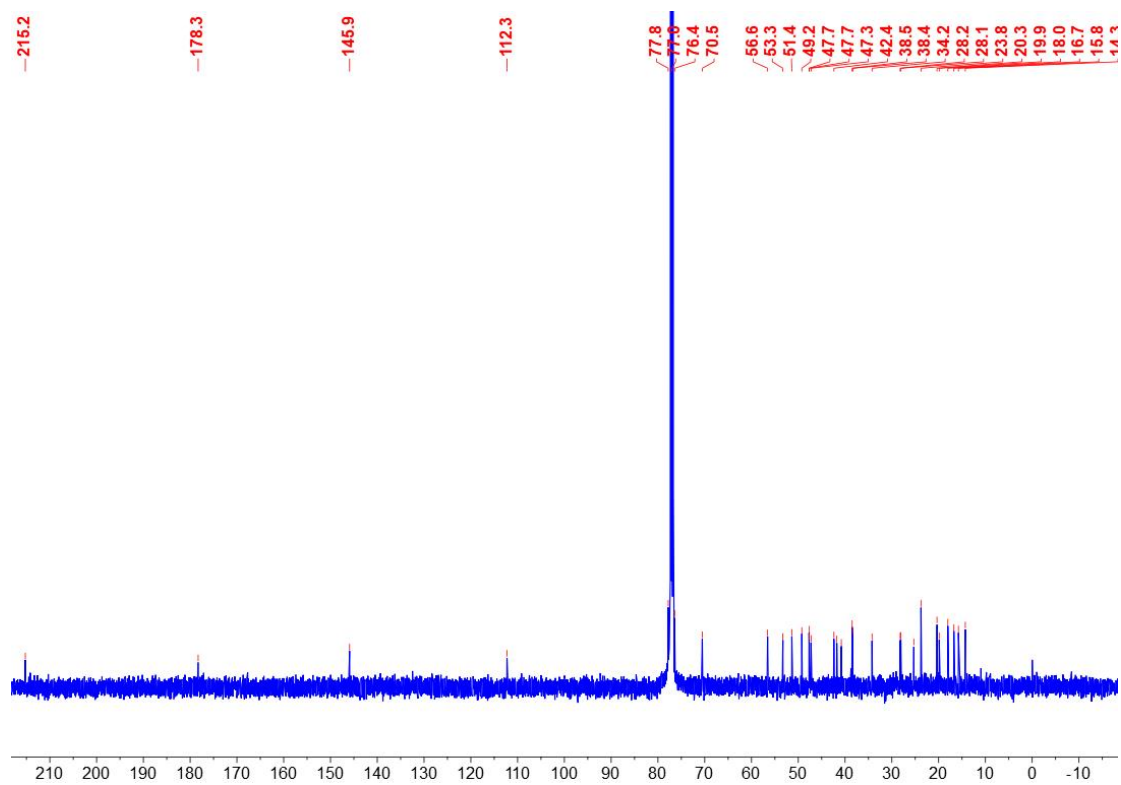

**Figure S4-3.** The  $^{13}\text{C}$  NMR spectrum of compound **4** (151 MHz,  $\text{CDCl}_3$ ).

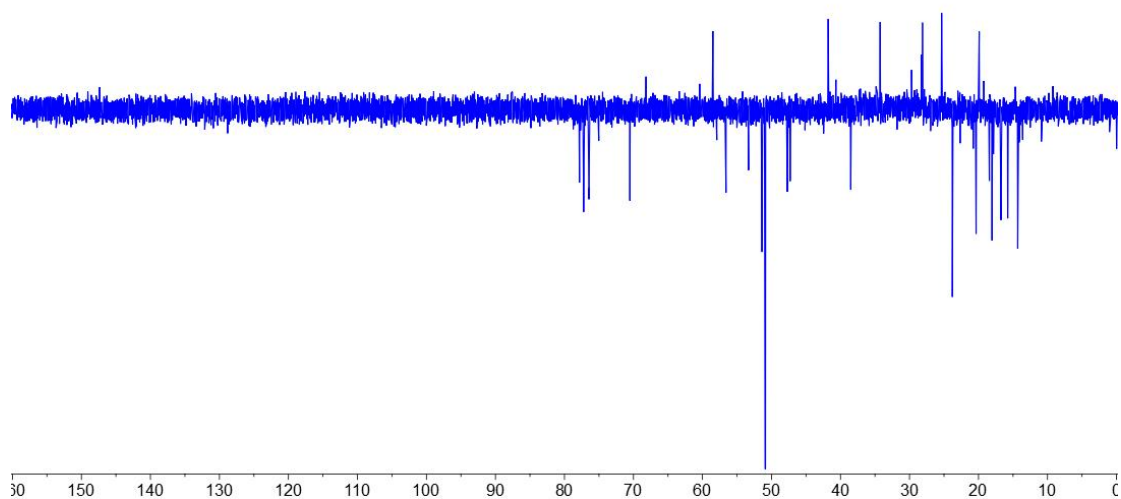

**Figure S4-4.** The DEPT 135 spectrum of compound **4** (151 MHz,  $\text{CDCl}_3$ ).



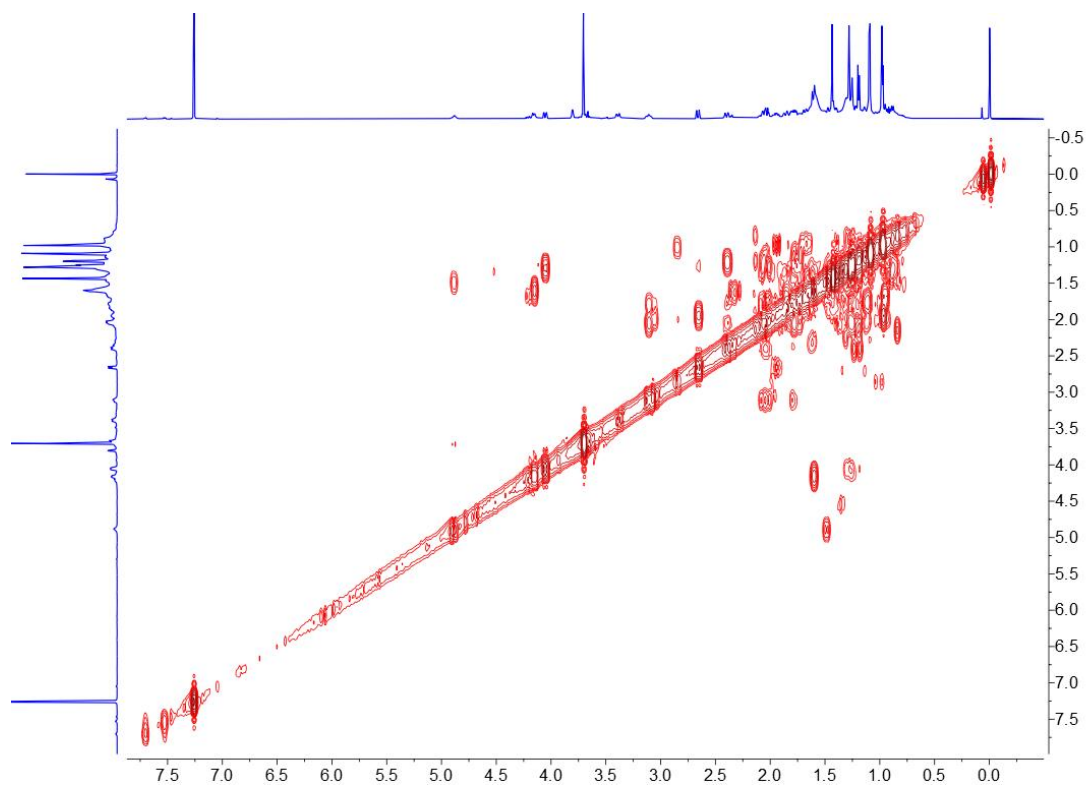

**Figure S4-5.** The  $^1\text{H}$ - $^1\text{H}$  COSY spectrum of compound **4** (600 MHz,  $\text{CDCl}_3$ ).

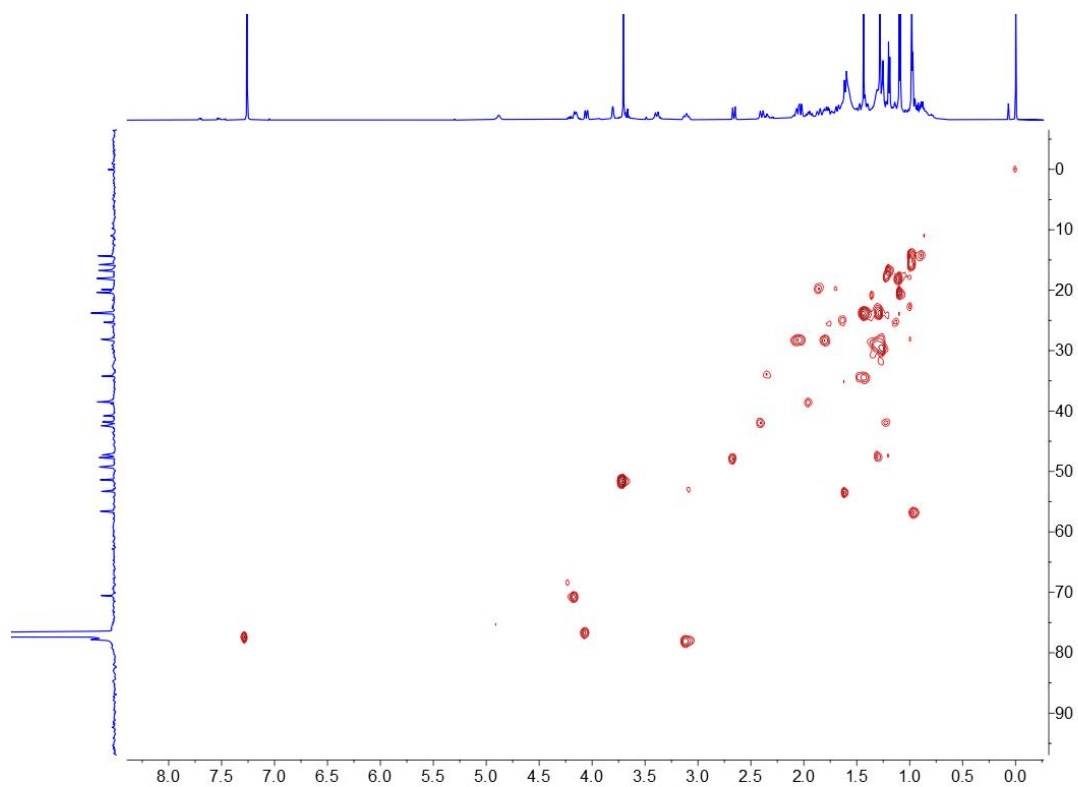

**Figure S4-6.** The HSQC spectrum of compound **4** (600/151 MHz,  $\text{CDCl}_3$ ).

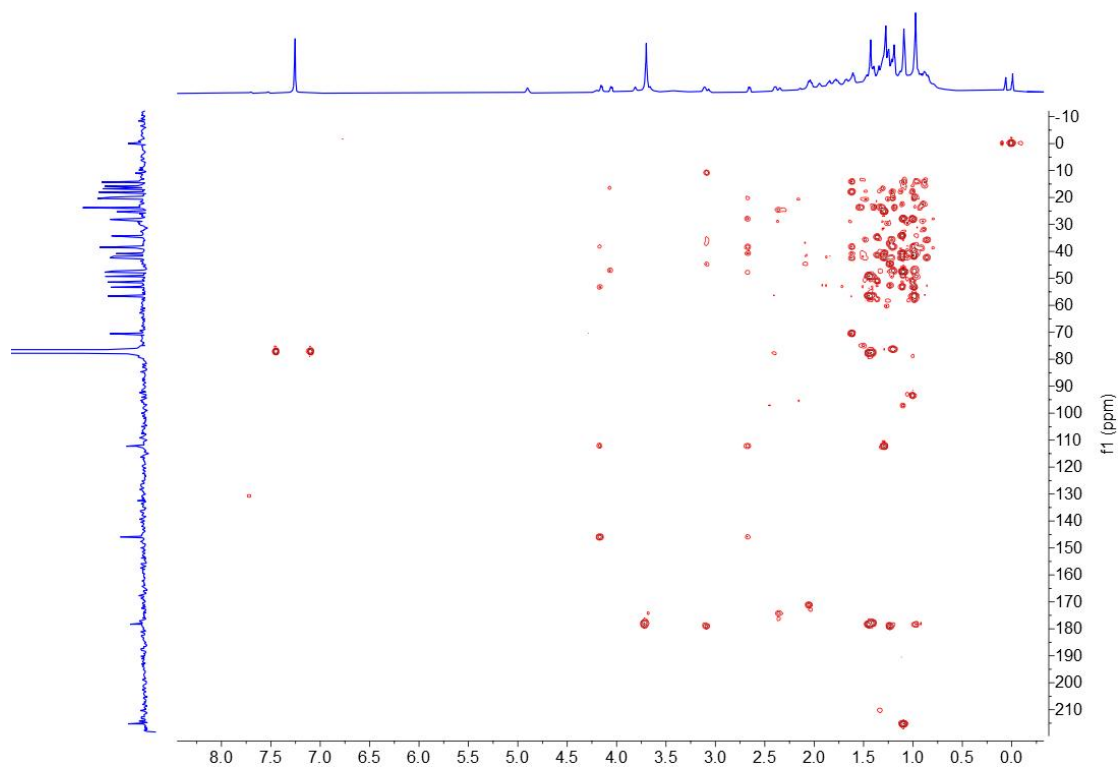

**Figure S4-7.** The HMBC spectrum of compound **4** (600/151 MHz,  $\text{CDCl}_3$ ).

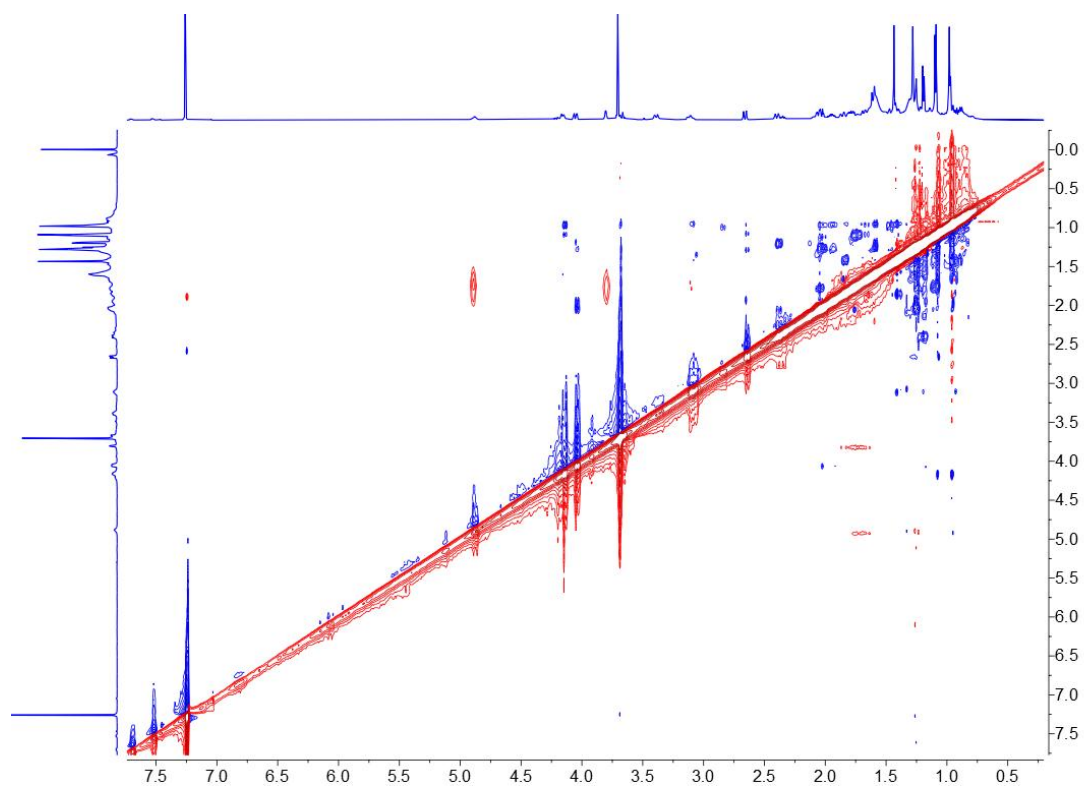

**Figure S4-8.** The NOESY spectrum of compound **4** (600 MHz,  $\text{CDCl}_3$ ).

## 5. Spectroscopic data for compound 5

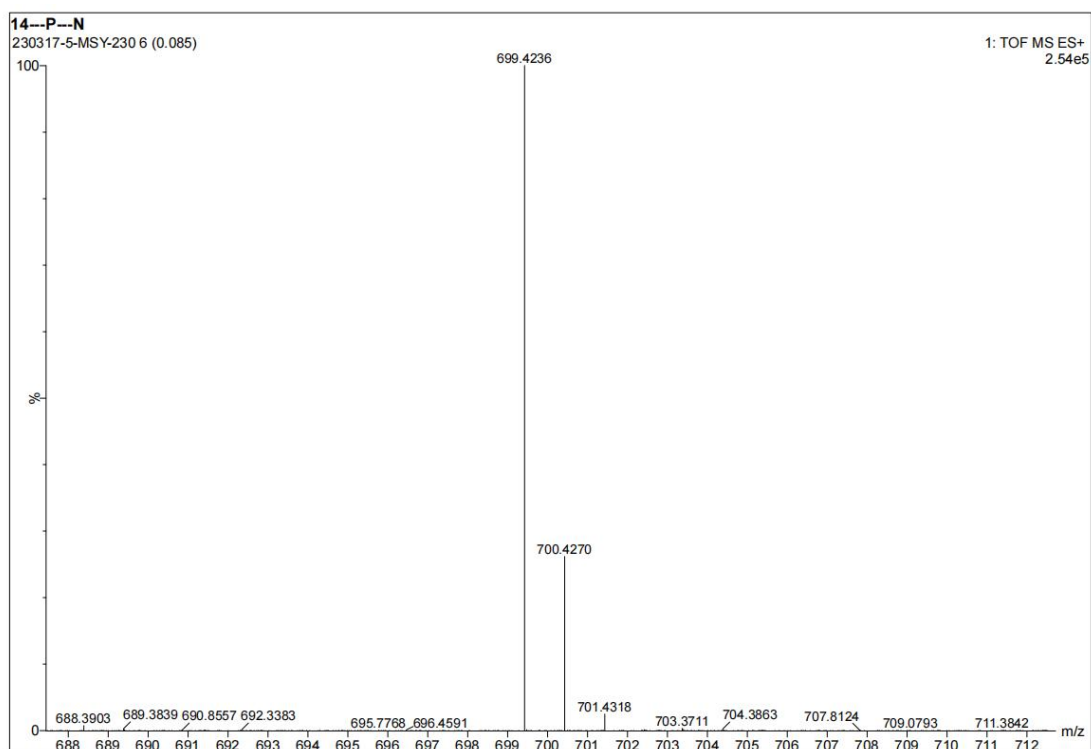

Figure S5-1. The HR-ESI-MS of compound 5.

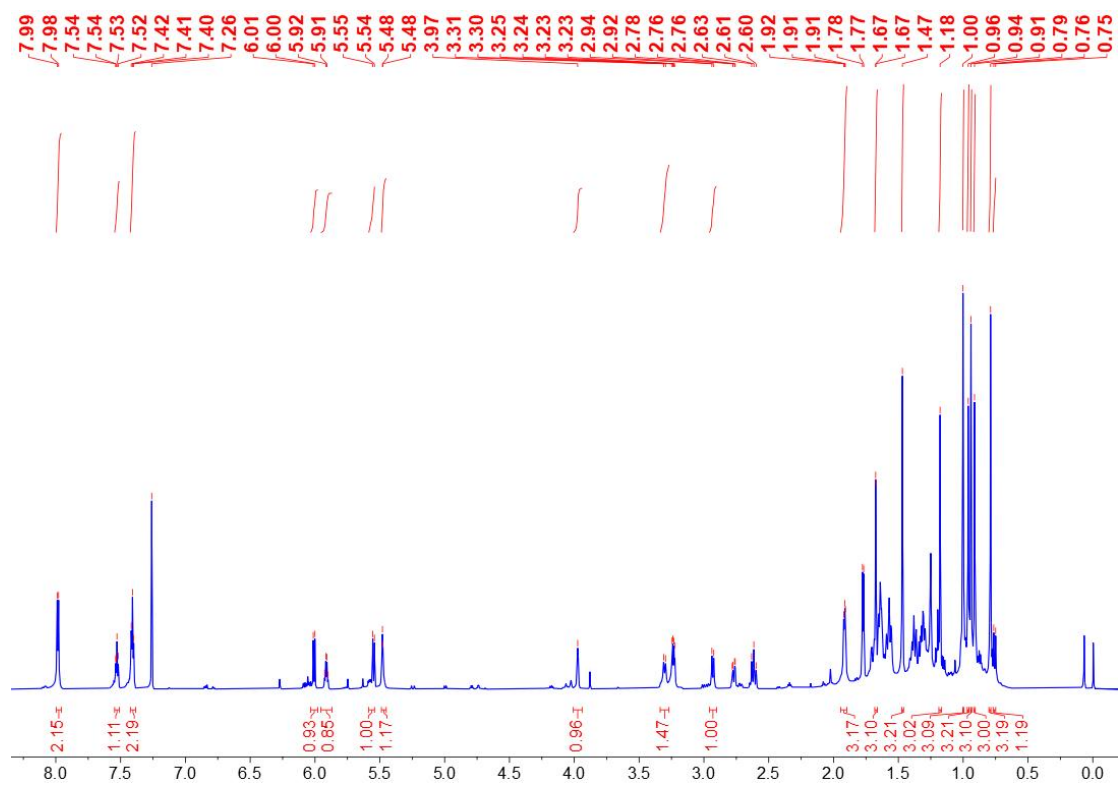

Figure S5-2. The  $^1\text{H}$  NMR spectrum of compound 5 (600 MHz,  $\text{CDCl}_3$ ).

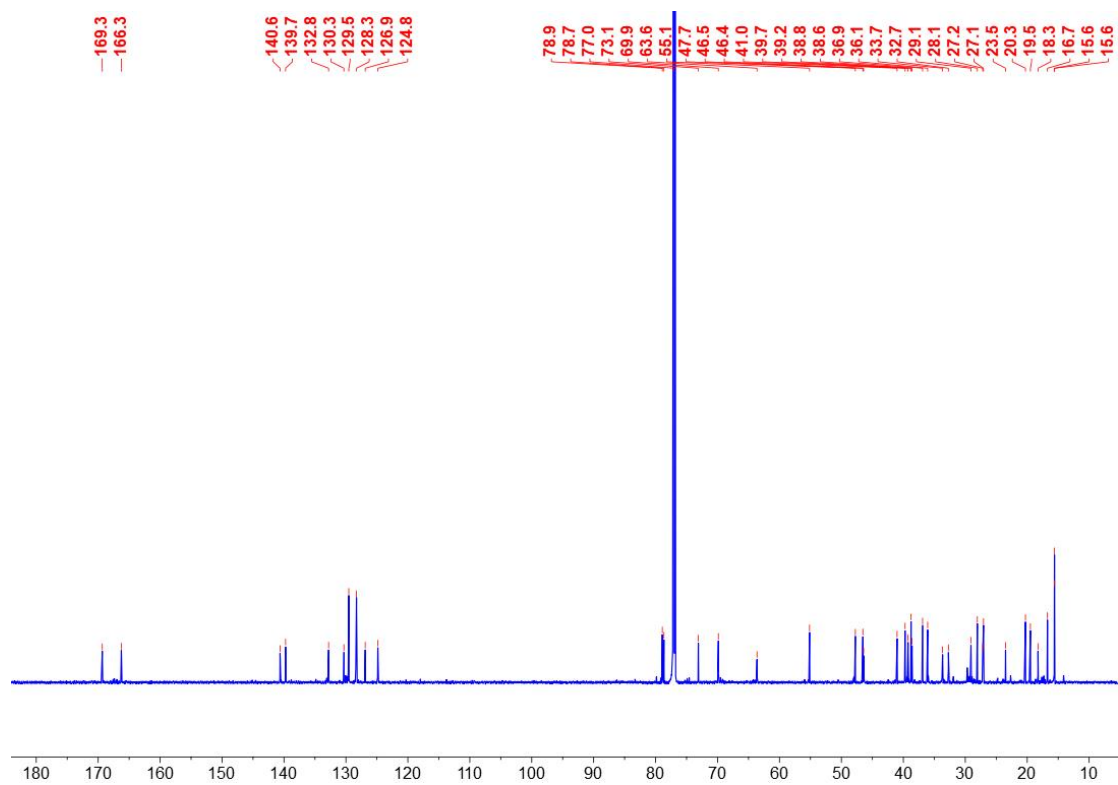

**Figure S5-3.** The  $^{13}\text{C}$  NMR spectrum of compound **5** (151 MHz,  $\text{CDCl}_3$ ).

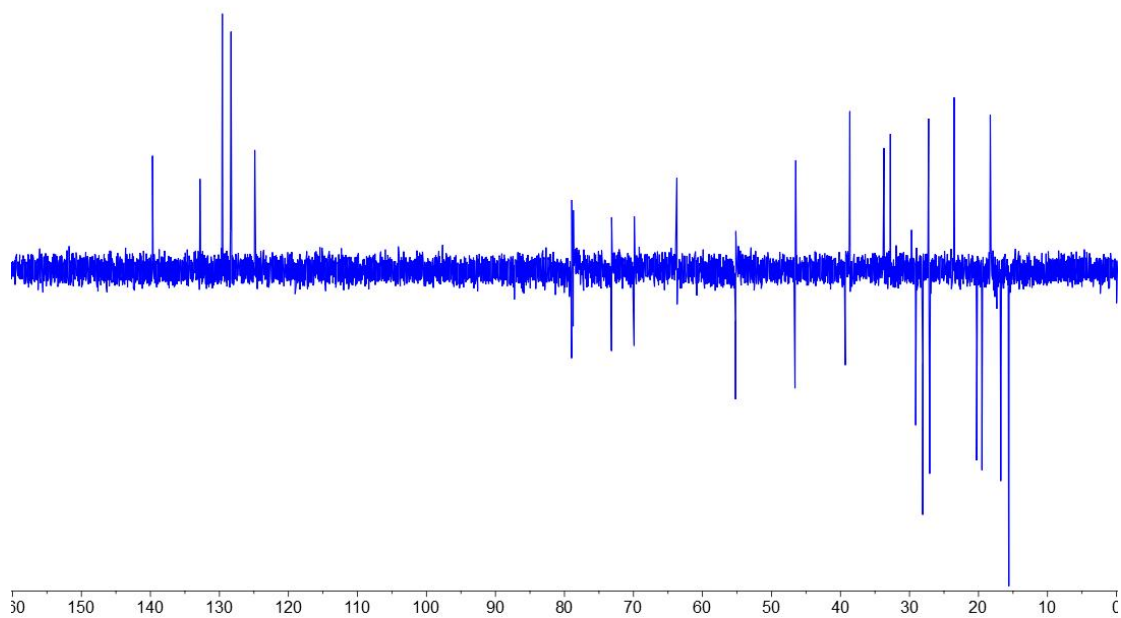

**Figure S5-4.** The DEPT 135 spectrum of compound **5** (151 MHz,  $\text{CDCl}_3$ ).

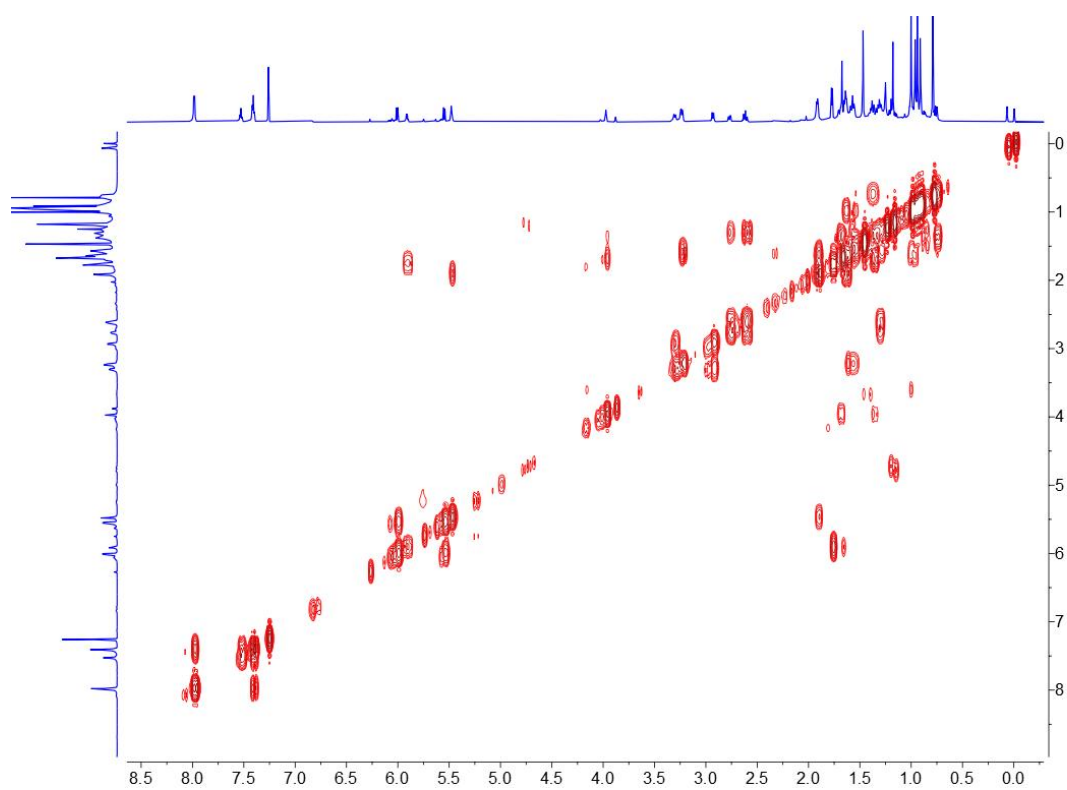

**Figure S5-5.** The  $^1\text{H}$ - $^1\text{H}$  COSY spectrum of compound **5** (600 MHz,  $\text{CDCl}_3$ ).

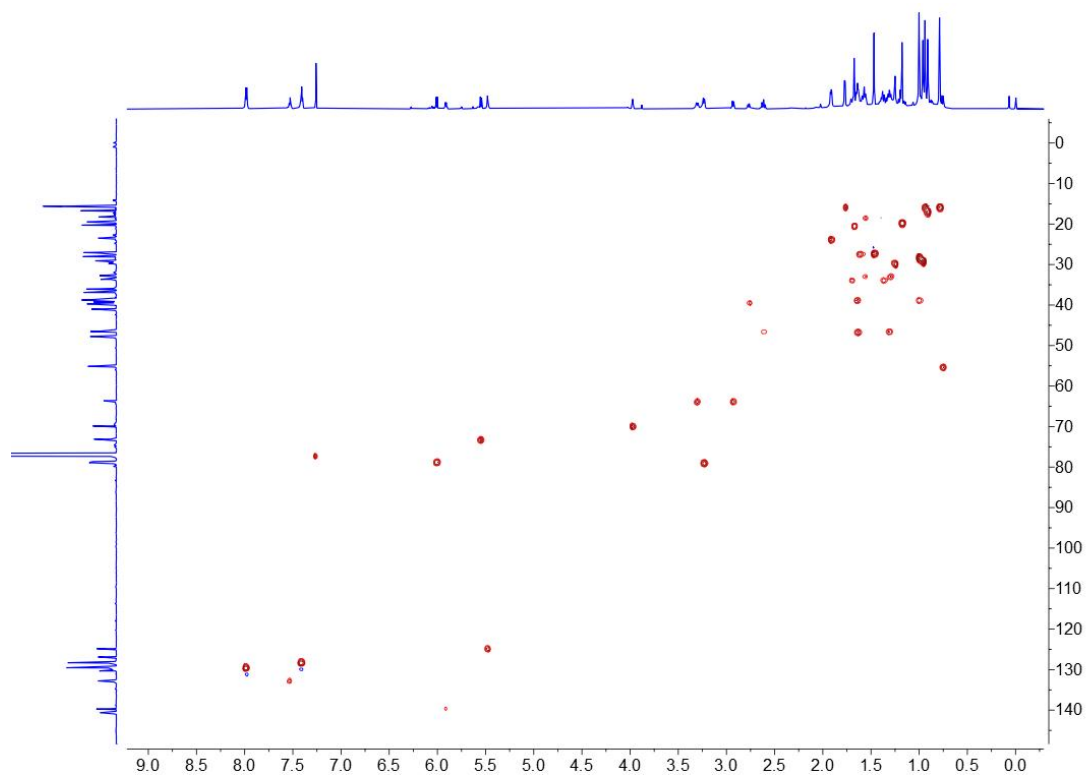

**Figure S5-6.** The HSQC spectrum of compound **5** (600/151 MHz,  $\text{CDCl}_3$ ).

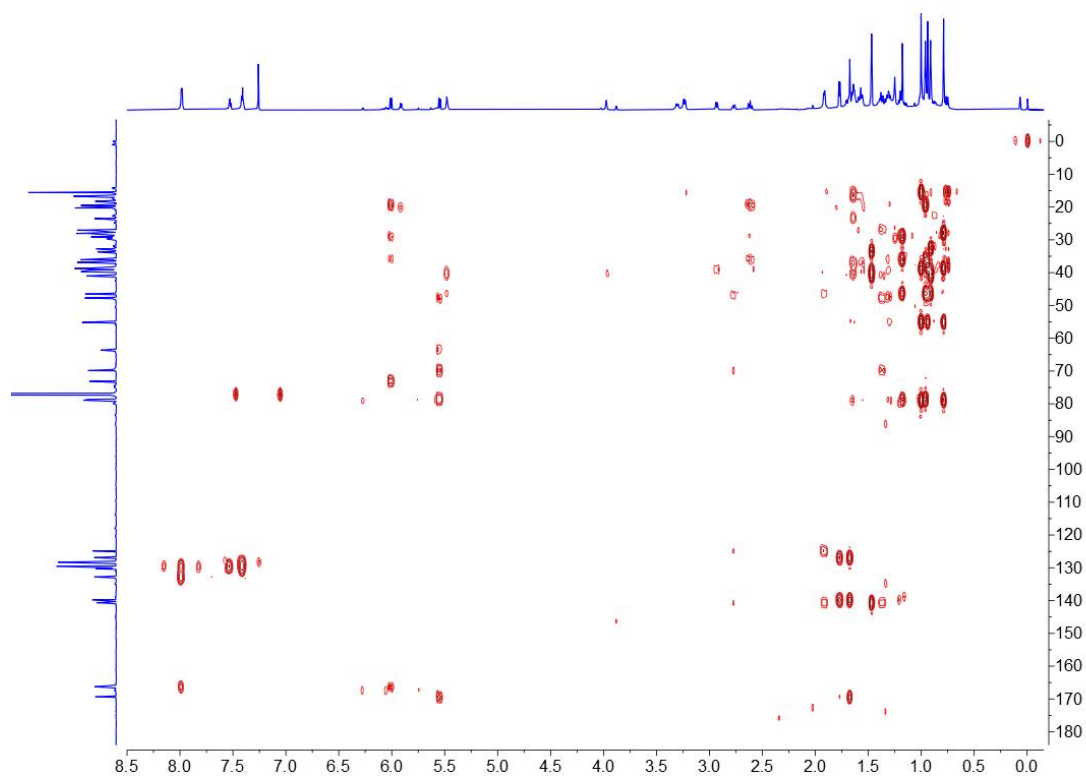

**Figure S5-7.** The HMBC spectrum of compound **5** (600/151 MHz,  $\text{CDCl}_3$ ).

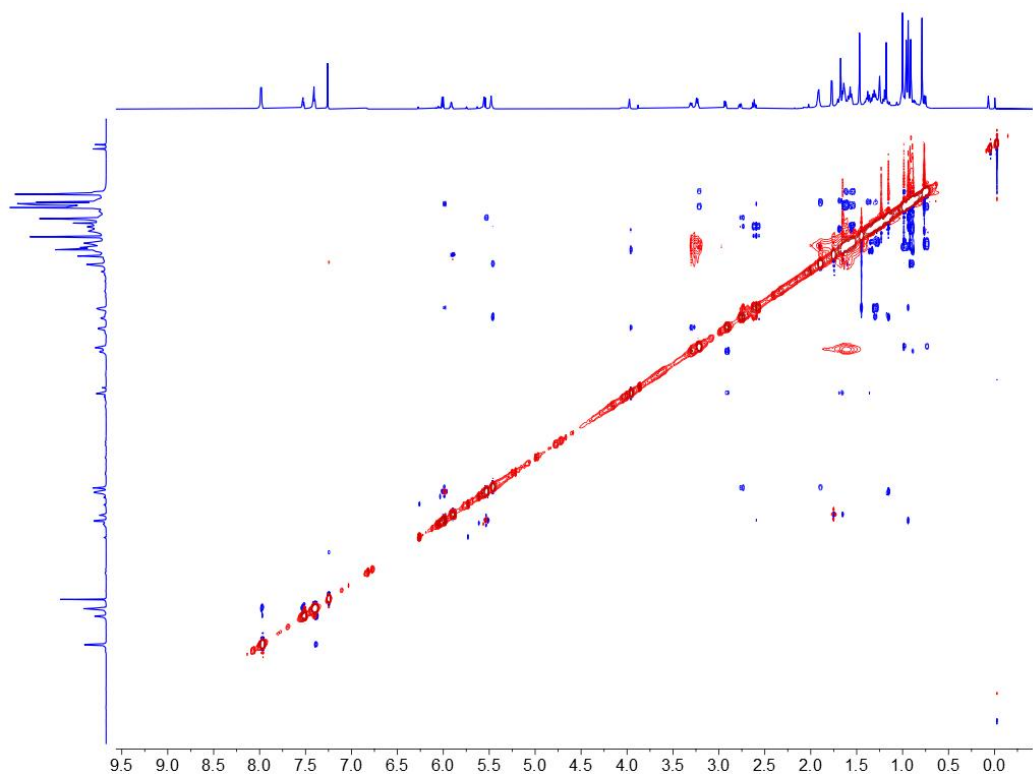

**Figure S5-8.** The NOESY spectrum of compound **5** (600 MHz,  $\text{CDCl}_3$ ).

## 6. Spectroscopic data for compound 6

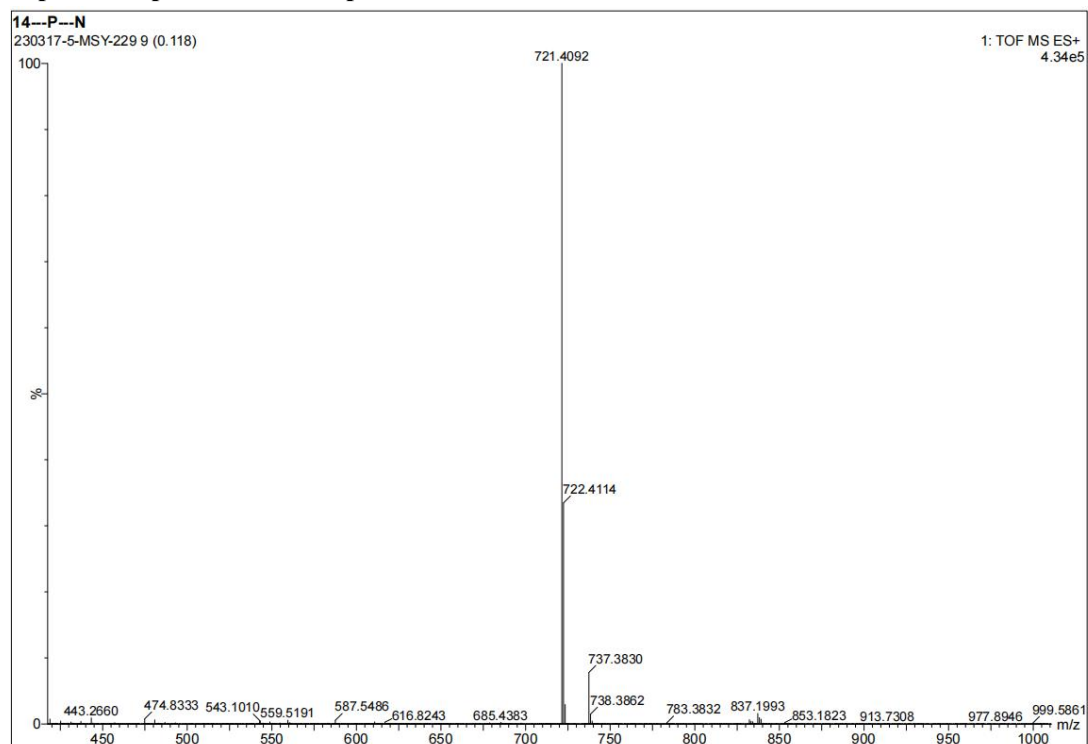

Figure S6-1. The HR-ESI-MS of compound 6.

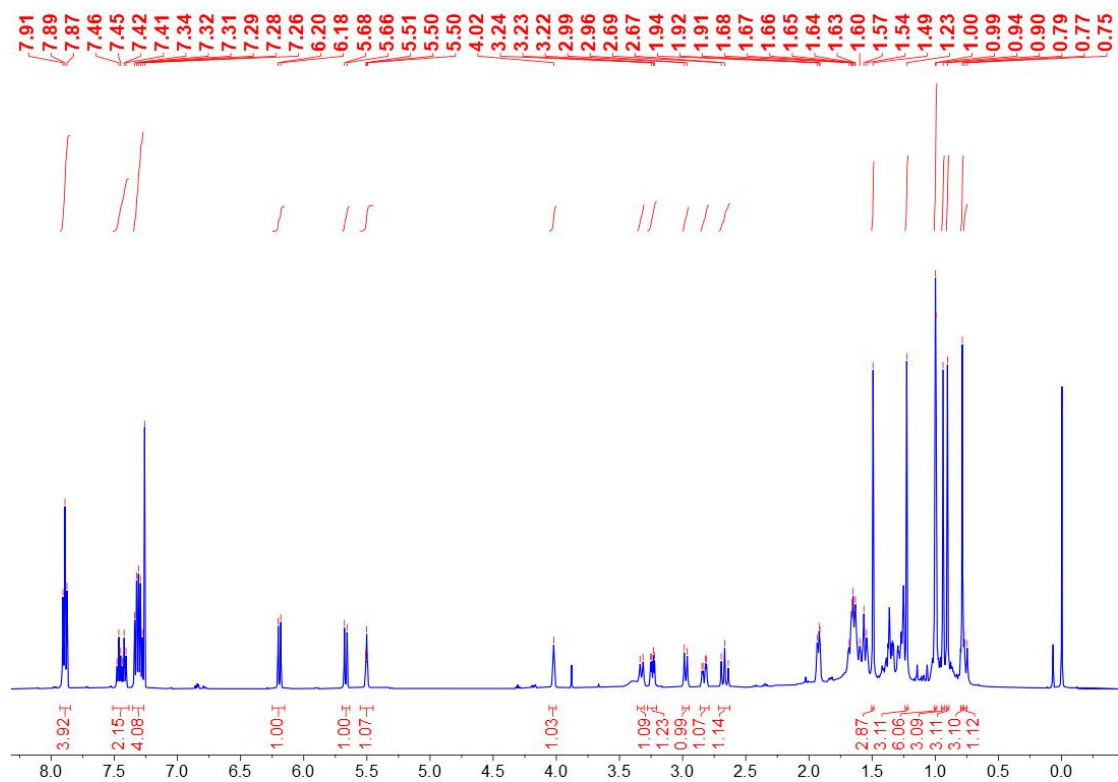

Figure S6-2. The  $^1\text{H}$  NMR spectrum of compound 6 (600 MHz,  $\text{CDCl}_3$ ).

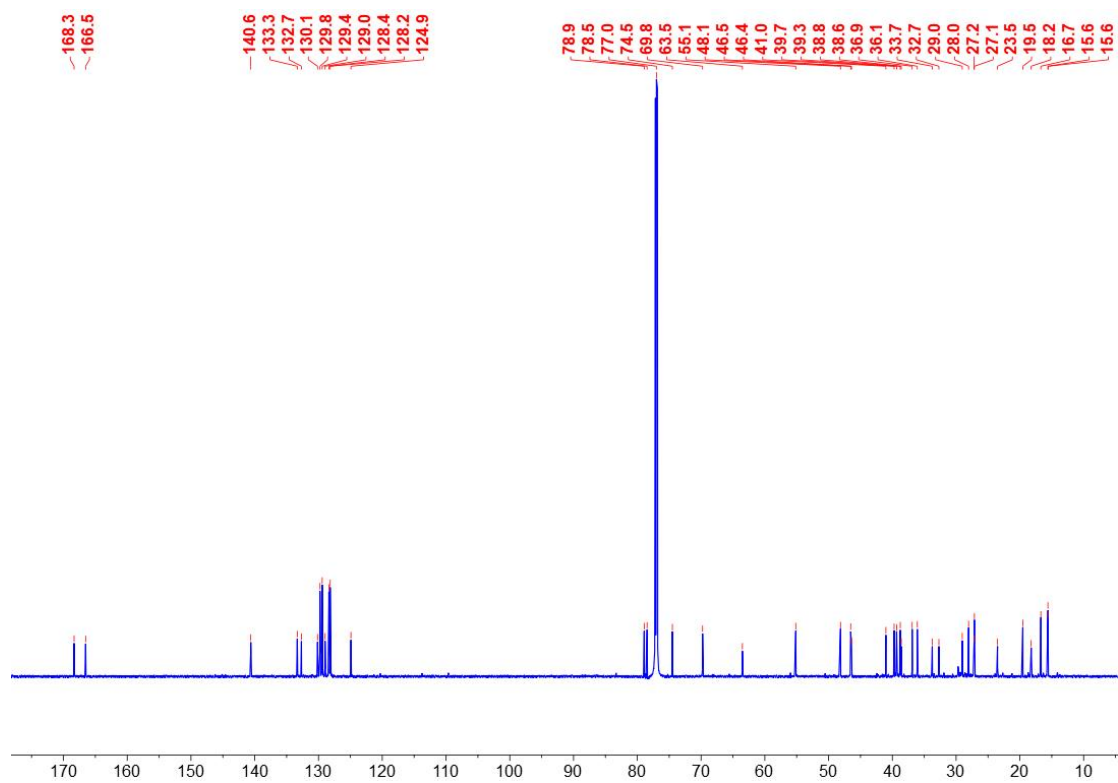

**Figure S6-3.** The  $^{13}\text{C}$  NMR spectrum of compound **6** (151 MHz,  $\text{CDCl}_3$ ).

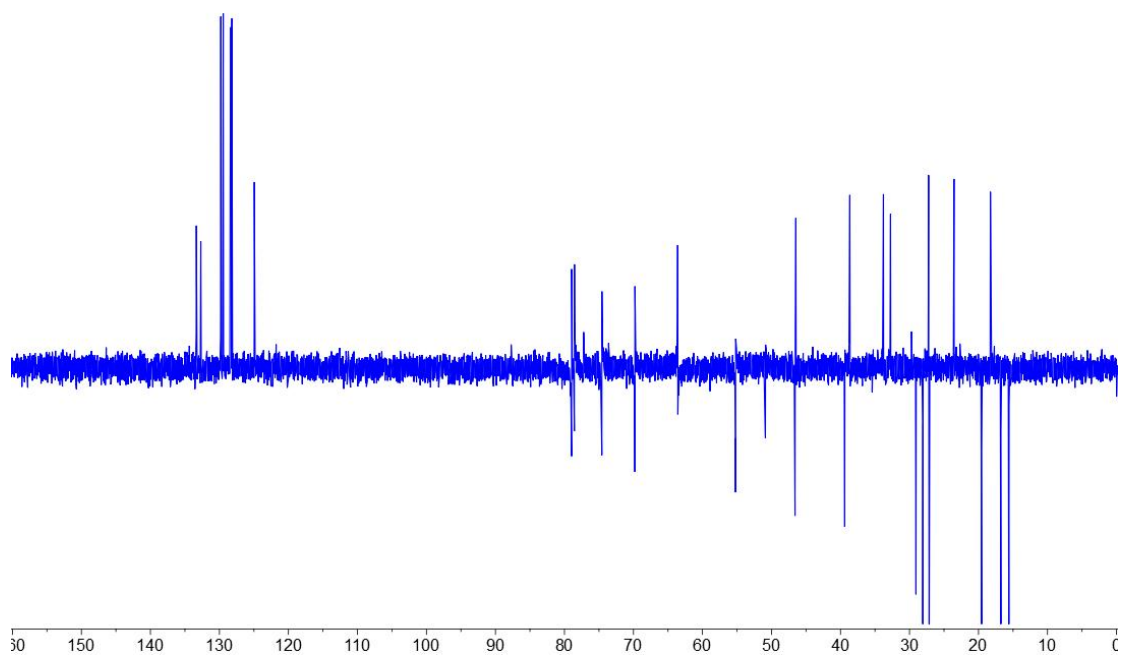

**Figure S6-4.** The DEPT 135 spectrum of compound **6** (151 MHz,  $\text{CDCl}_3$ ).



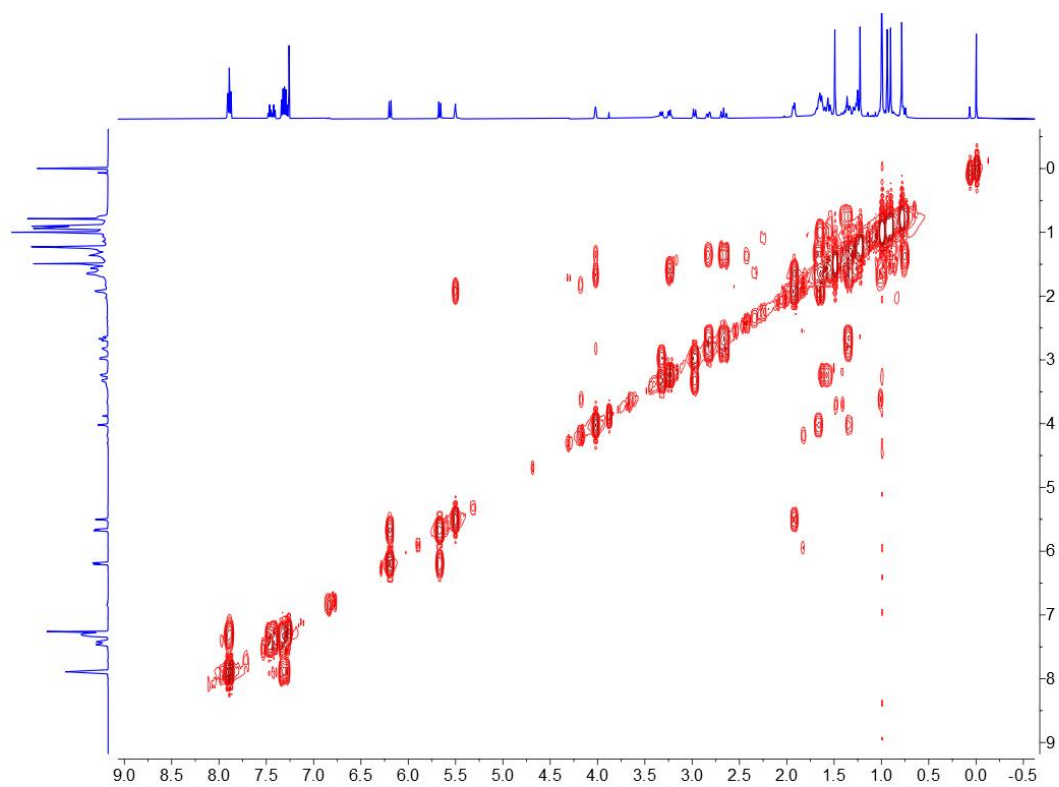

**Figure S6-5.** The  $^1\text{H}$ - $^1\text{H}$  COSY spectrum of compound **6** (600 MHz,  $\text{CDCl}_3$ ).

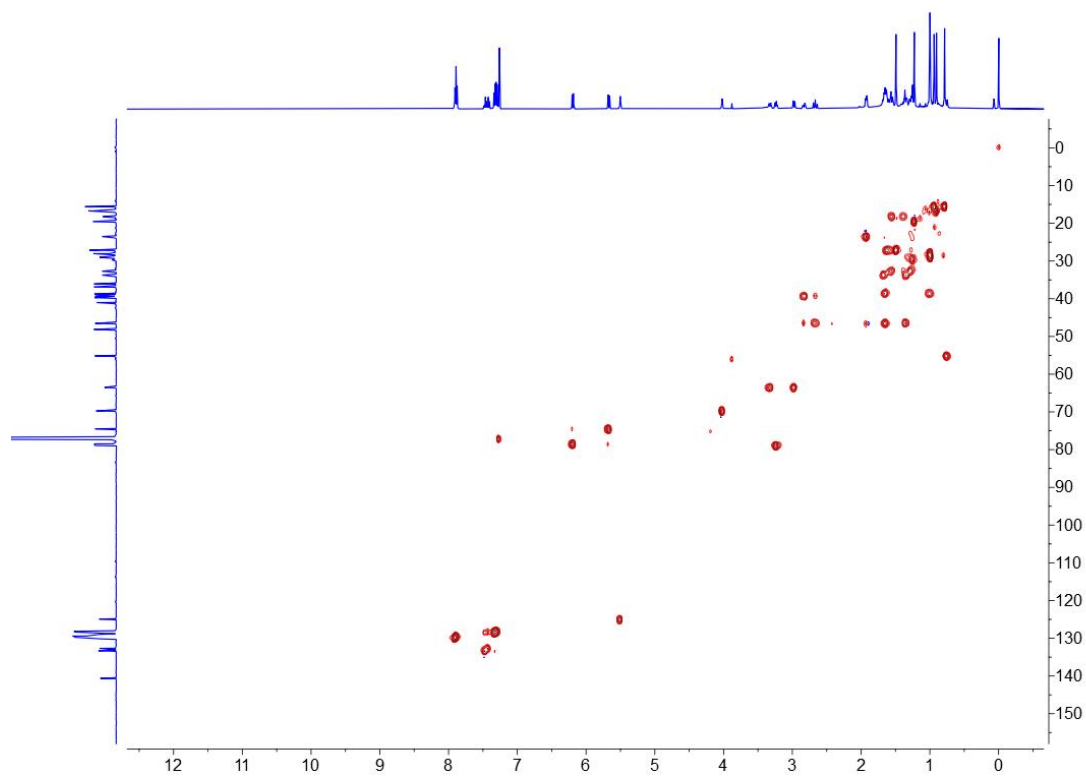

**Figure S6-6.** The HSQC spectrum of compound **6** (600/151 MHz,  $\text{CDCl}_3$ ).

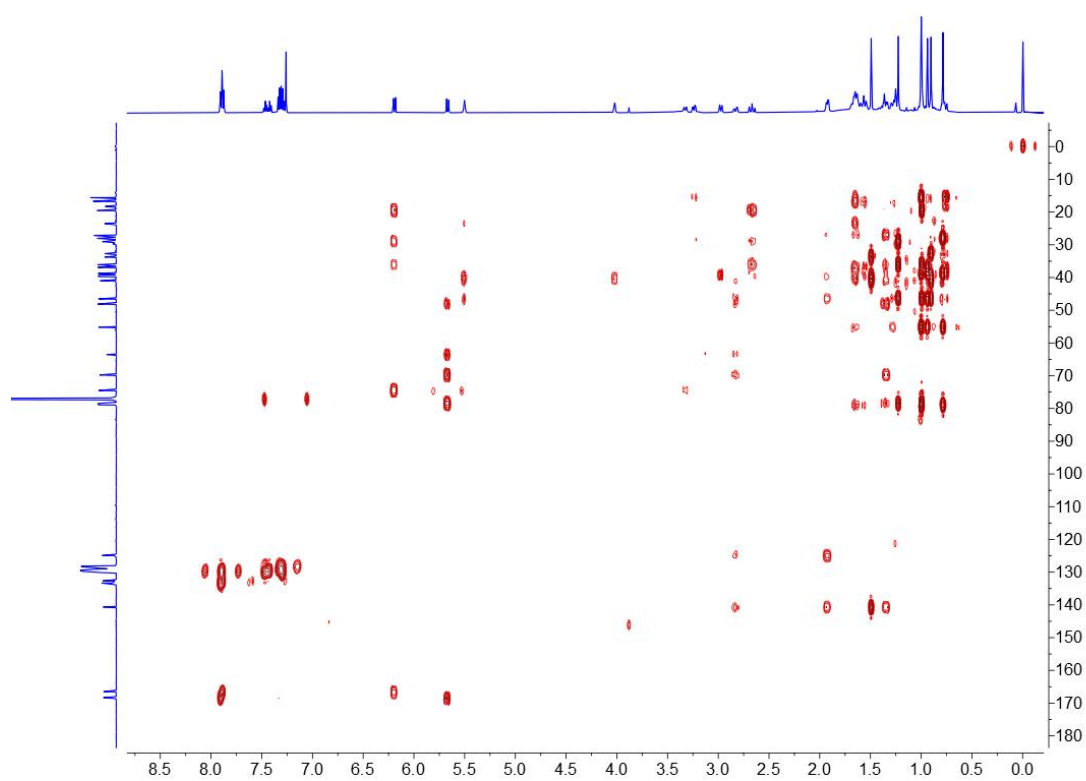

**Figure S6-7.** The HMBC spectrum of compound **6** (600/151 MHz,  $\text{CDCl}_3$ ).

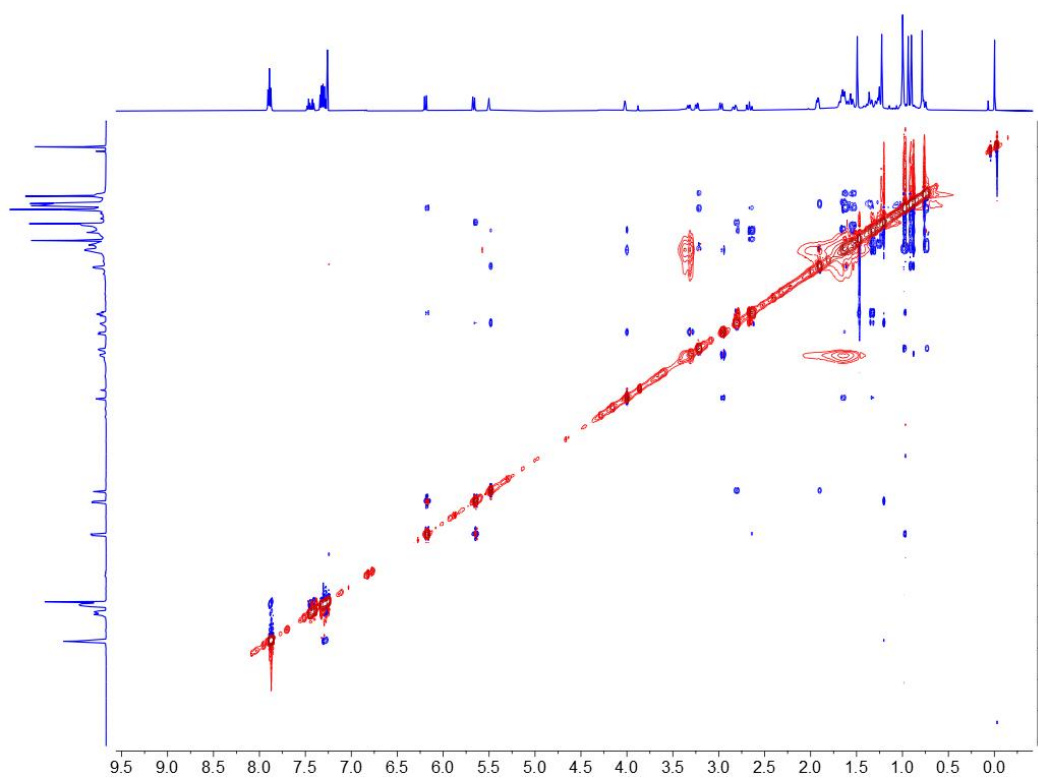

**Figure S6-8.** The NOESY spectrum of compound **6** (600 MHz,  $\text{CDCl}_3$ ).

## 7. Spectroscopic data for compound 7

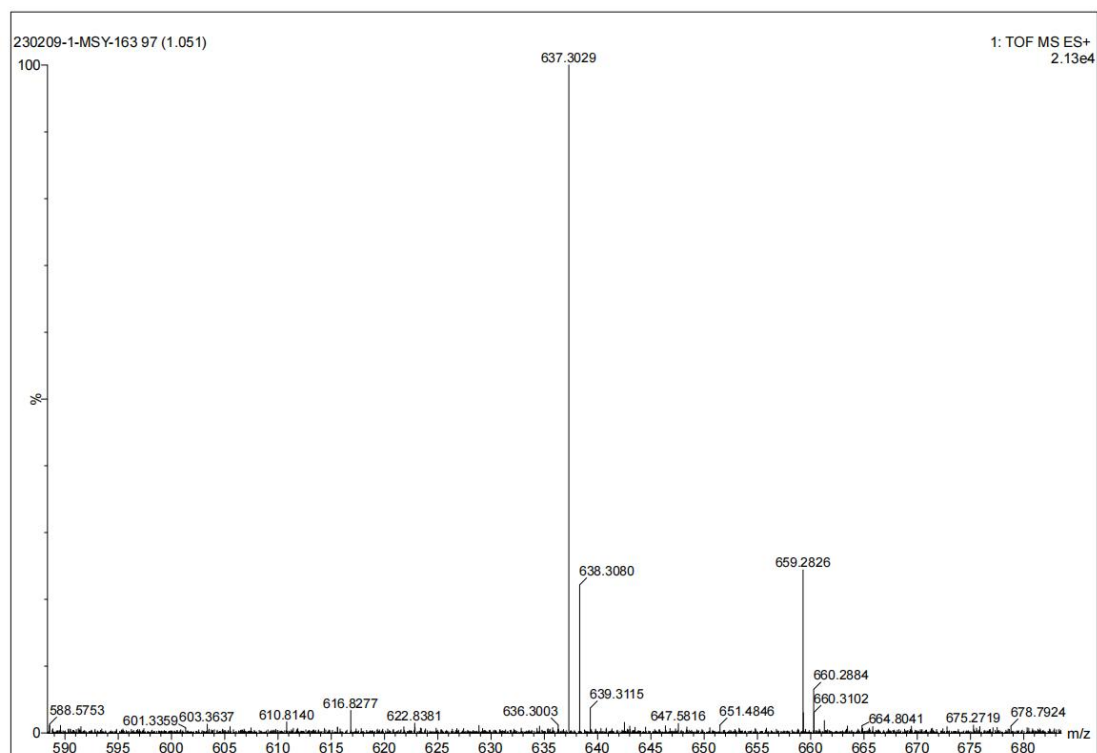

Figure S7-1. The HR-ESI-MS spectrum of compound 7.

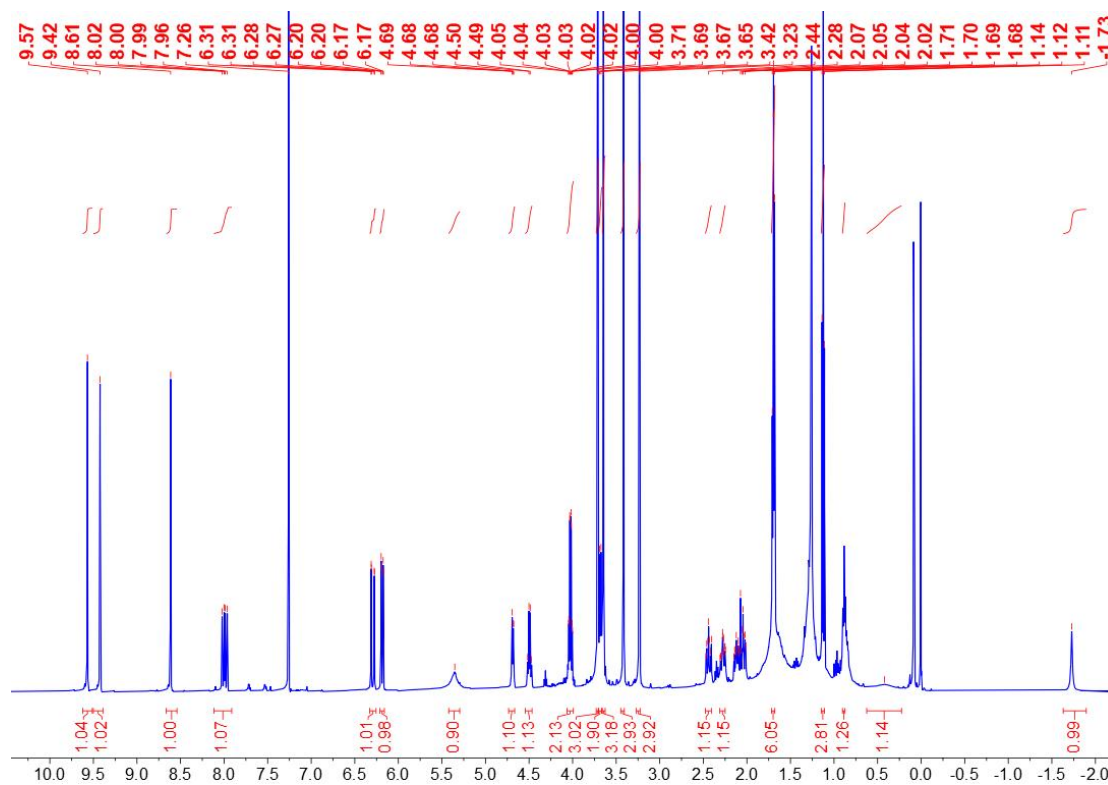

Figure S7-2. The  $^1\text{H}$  NMR spectrum of compound 7 (600 MHz,  $\text{CDCl}_3$ ).

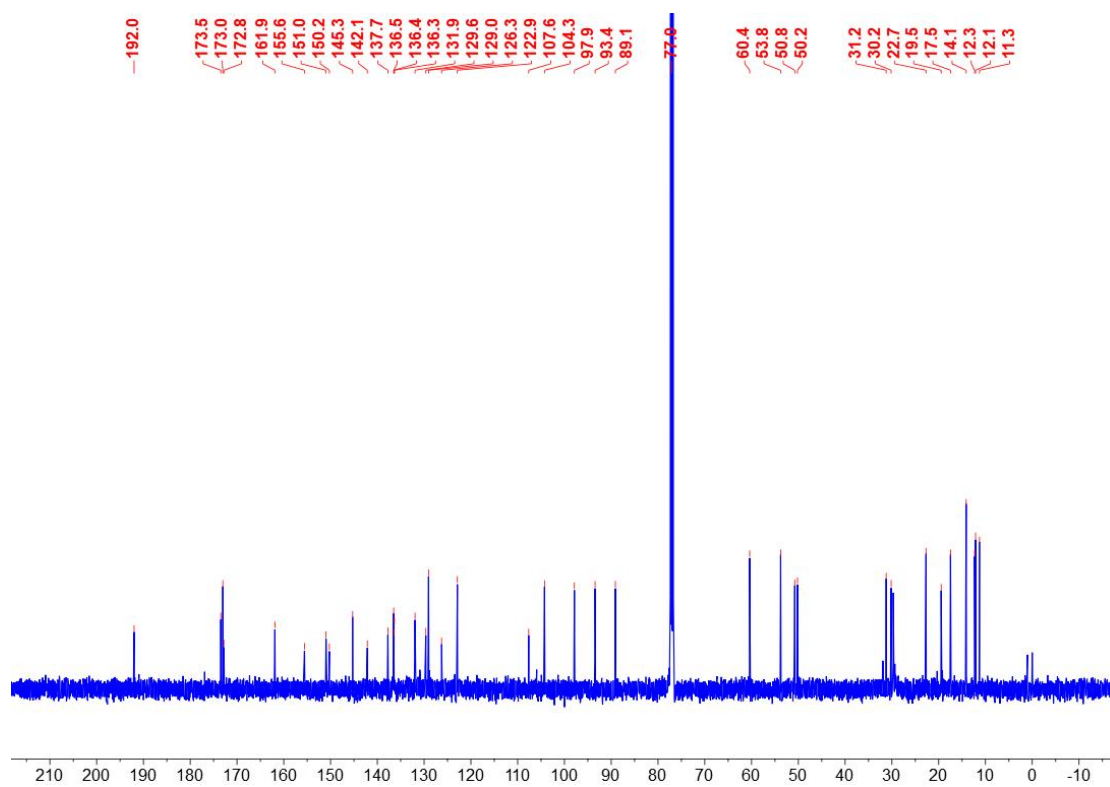

**Figure S7-3.** The  $^{13}\text{C}$  NMR spectrum of compound **7** (151 MHz,  $\text{CDCl}_3$ ).

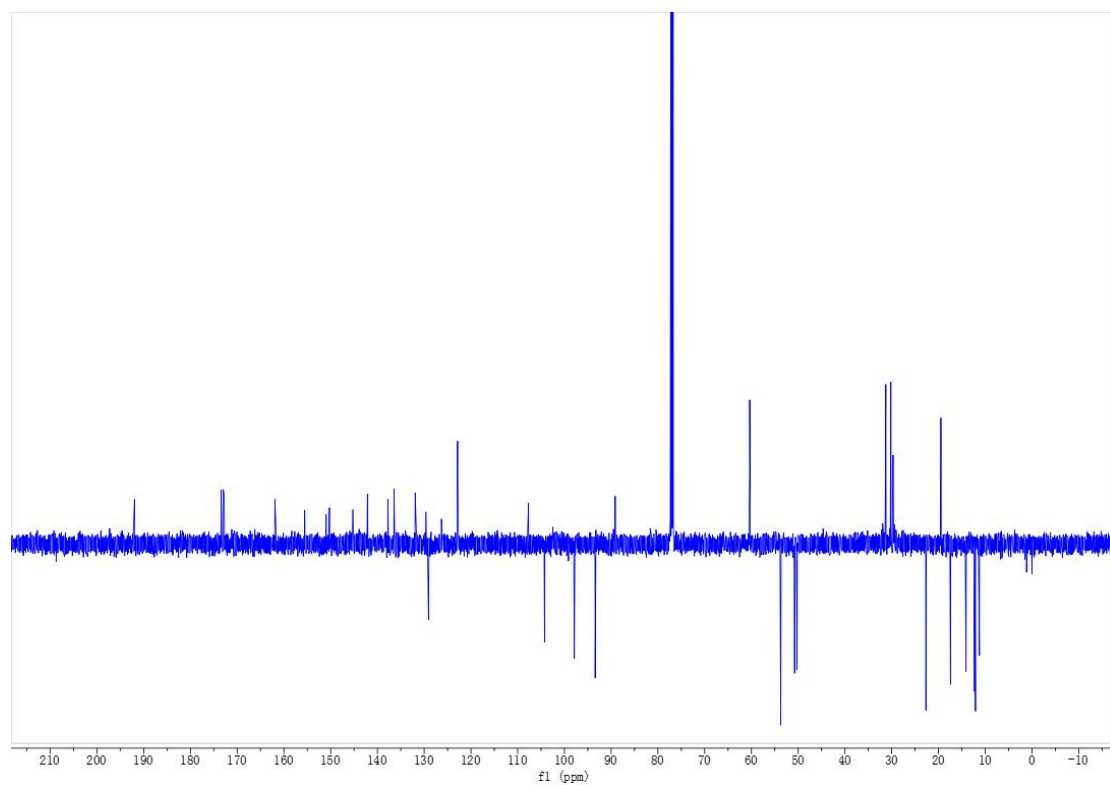

**Figure S7-4.** The DEPT 135 spectrum of compound **7** (151 MHz,  $\text{CDCl}_3$ ).

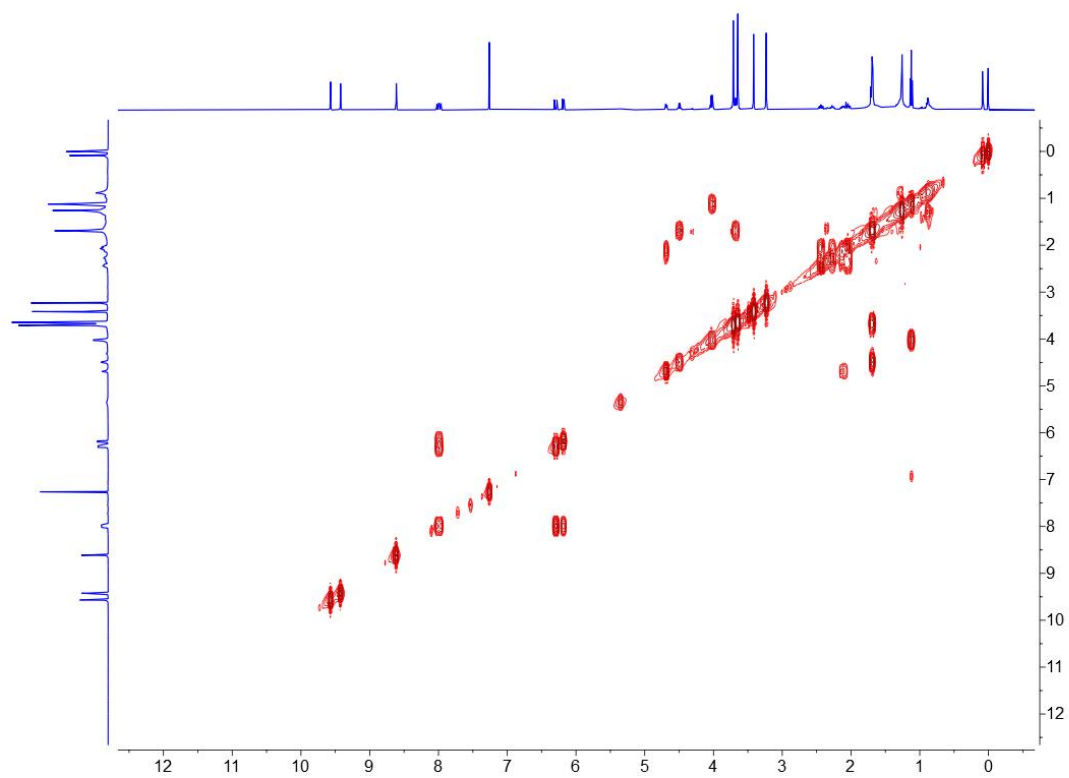

**Figure S7-5.** The  $^1\text{H}$ - $^1\text{H}$  COSY spectrum of compound **7** (600 MHz,  $\text{CDCl}_3$ ).

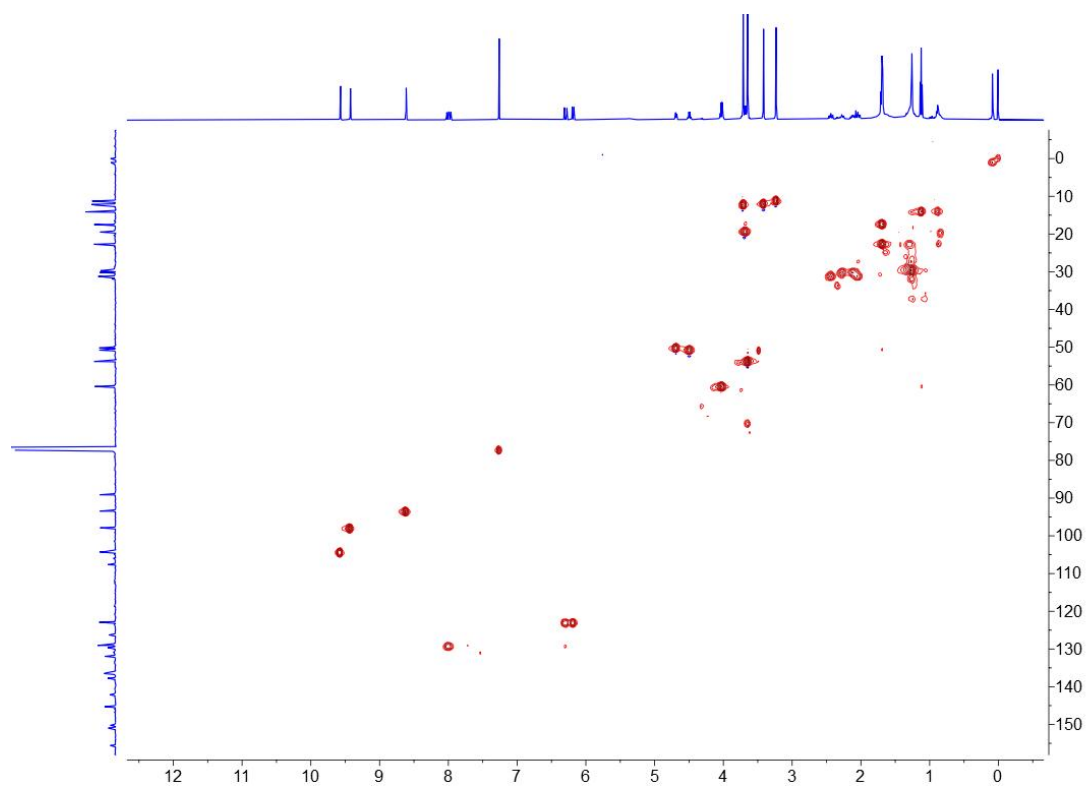

**Figure S7-6.** The HSQC spectrum of compound **7** (600/151 MHz,  $\text{CDCl}_3$ )

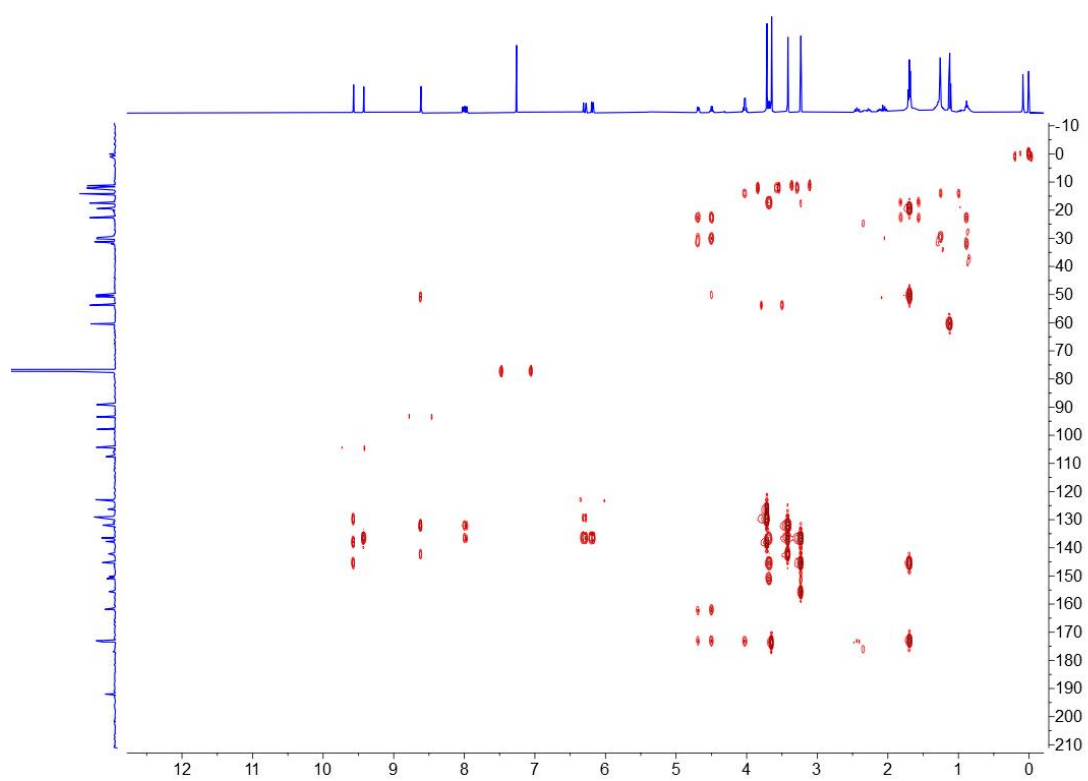

**Figure S7-7.** The HMBC spectrum of compound **7** (600/151 MHz,  $\text{CDCl}_3$ )

8.

## Spectroscopic data for compound **8**

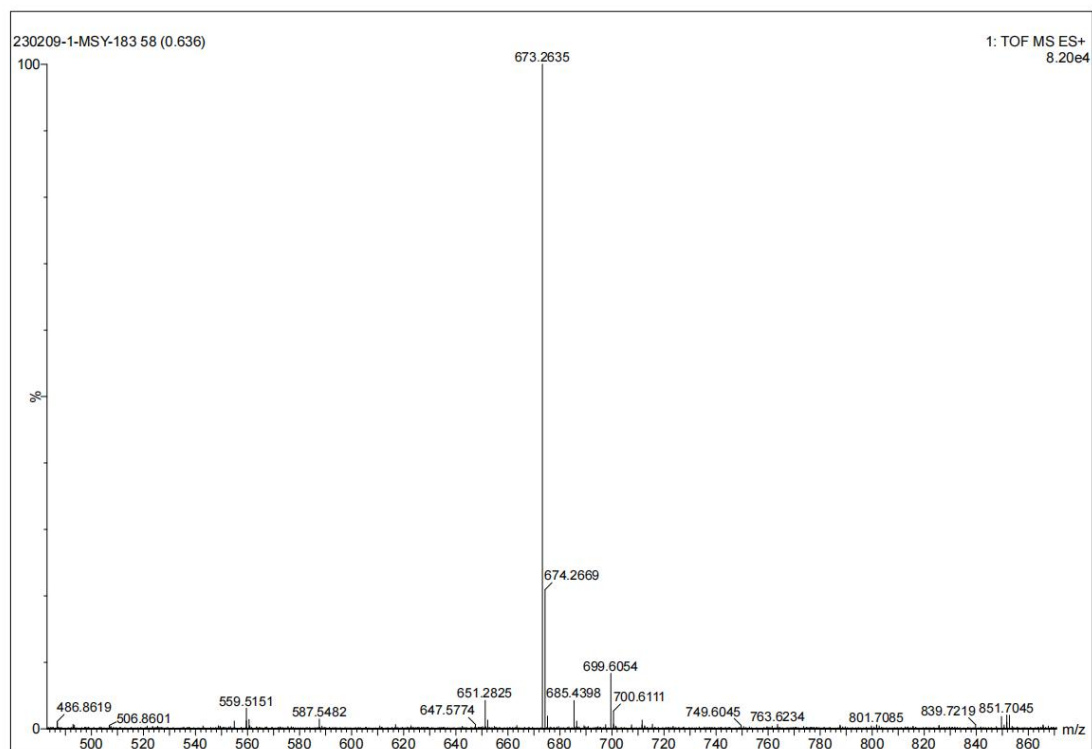

Figure S8-1. The HR-ESI-MS spectrum of compound **8**.

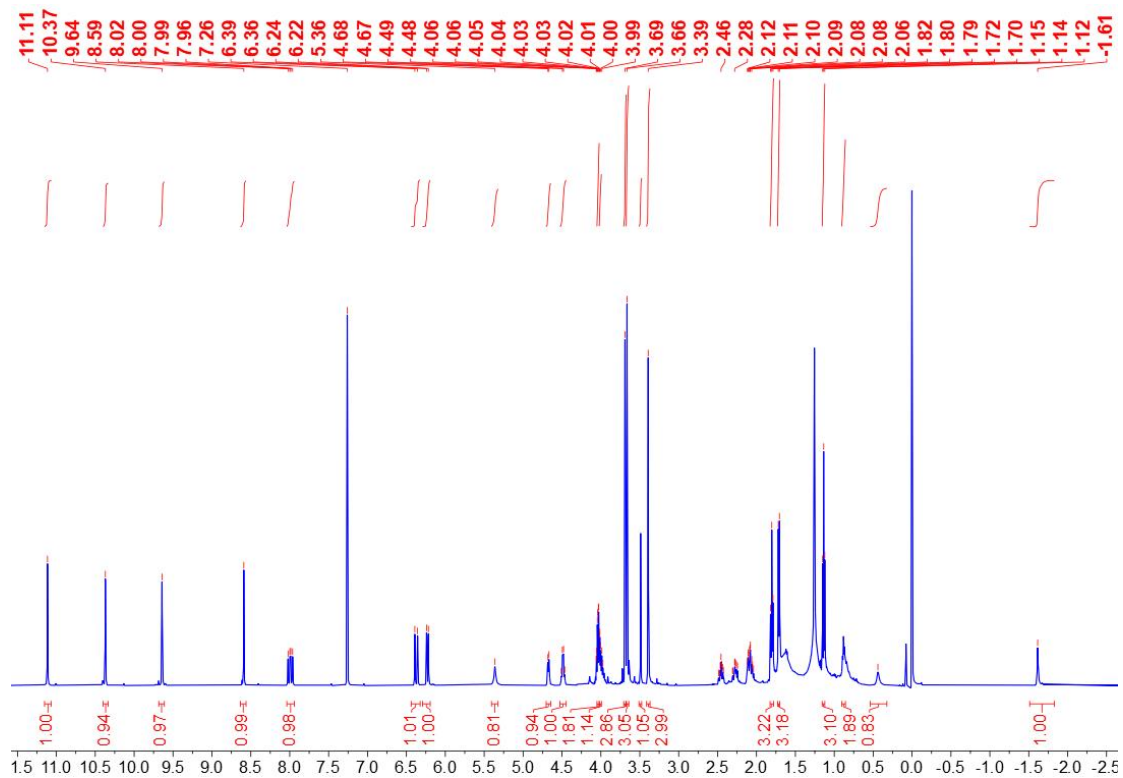

Figure S8-2. The  $^1\text{H}$  NMR spectrum of compound **8** (600 MHz,  $\text{CDCl}_3$ ).

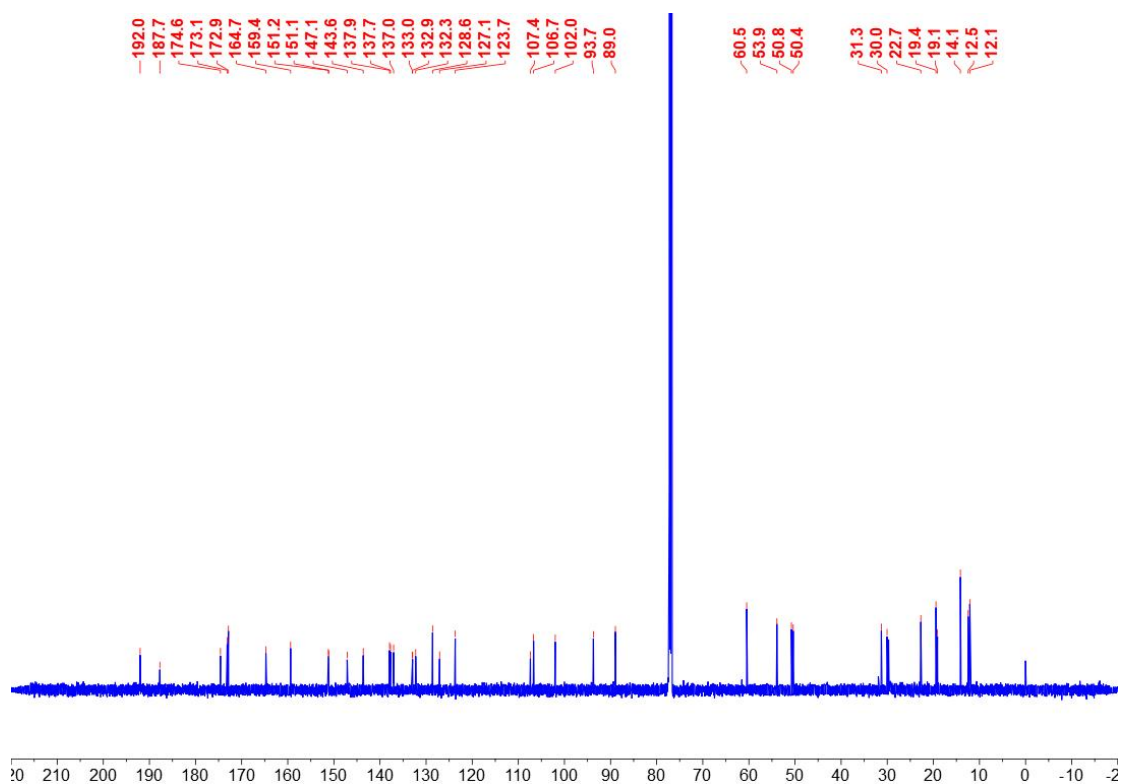

**Figure S8-3.** The  $^{13}\text{C}$  NMR spectrum of compound **8** (151 MHz,  $\text{CDCl}_3$ ).

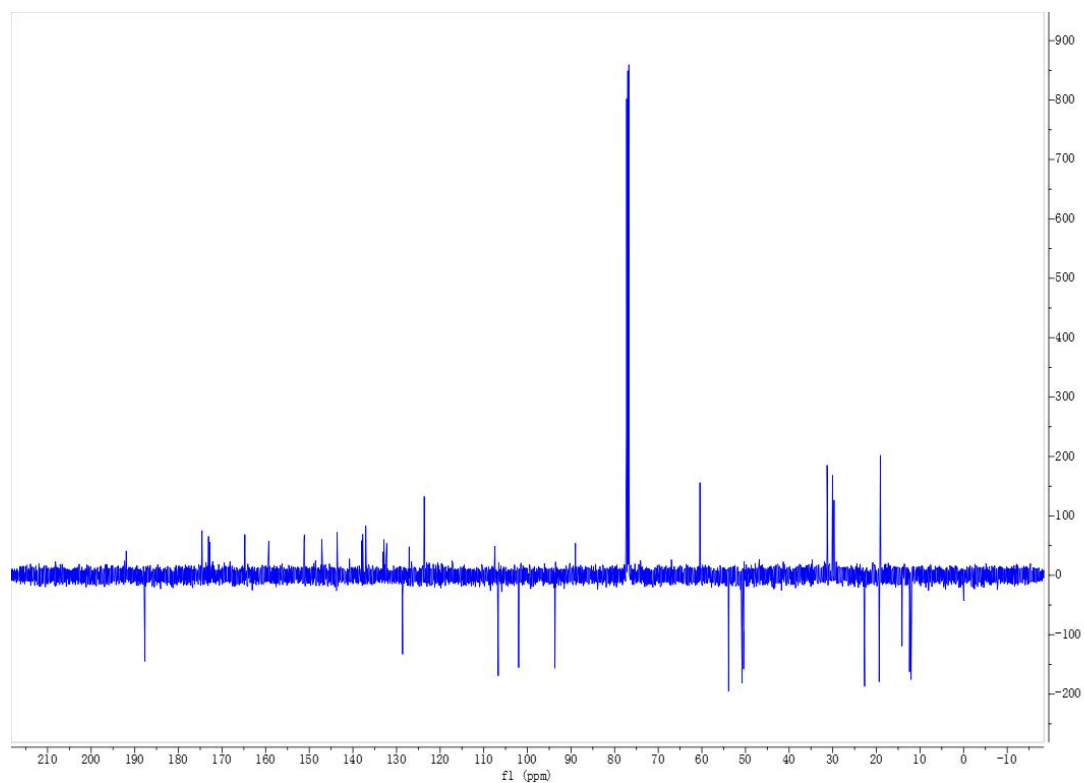

**Figure S8-4.** The DEPT 135 spectrum of compound **8** (151 MHz,  $\text{CDCl}_3$ ).



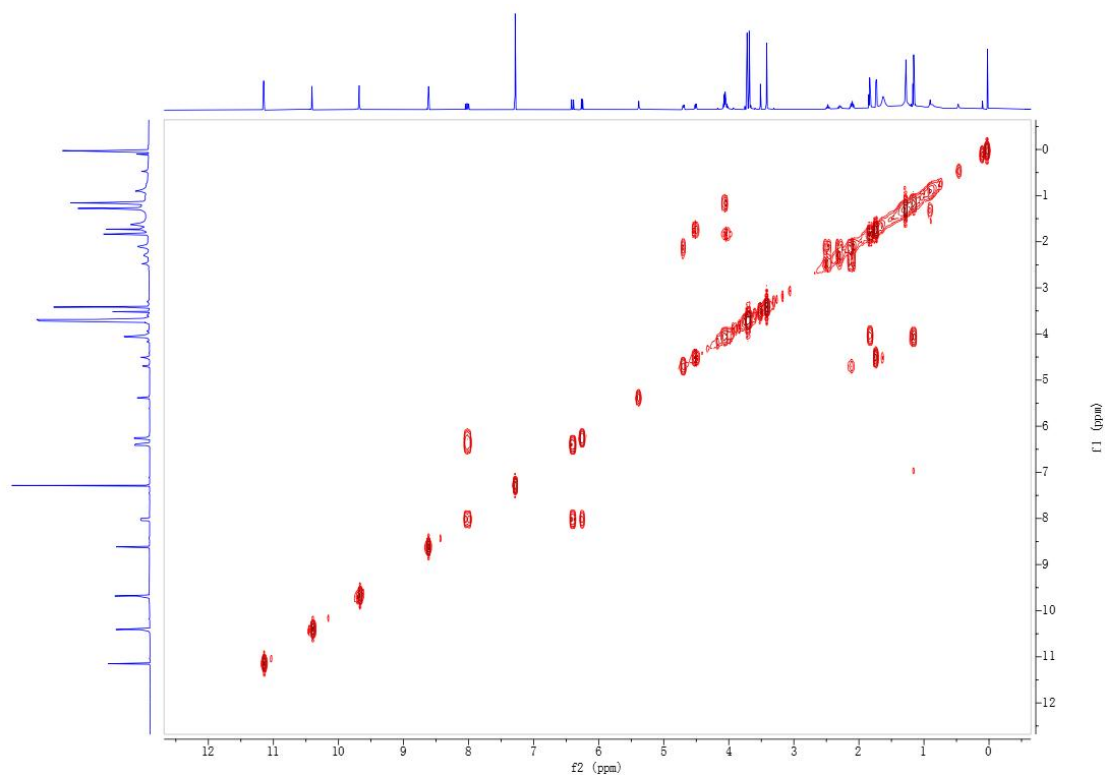

**Figure S8-5.** The  $^1\text{H}$ - $^1\text{H}$  COSY spectrum of compound **8** (600 MHz,  $\text{CDCl}_3$ ).

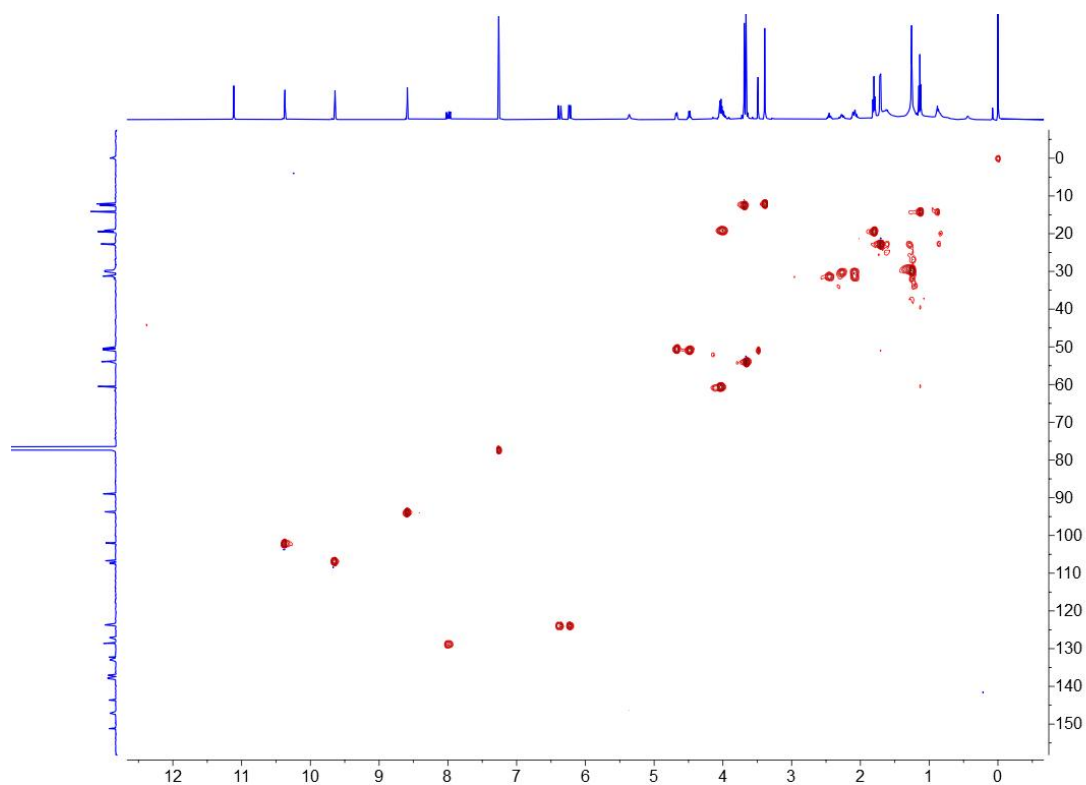

**Figure S8-6.** The HSQC spectrum of compound **8** (600/151 MHz,  $\text{CDCl}_3$ ).

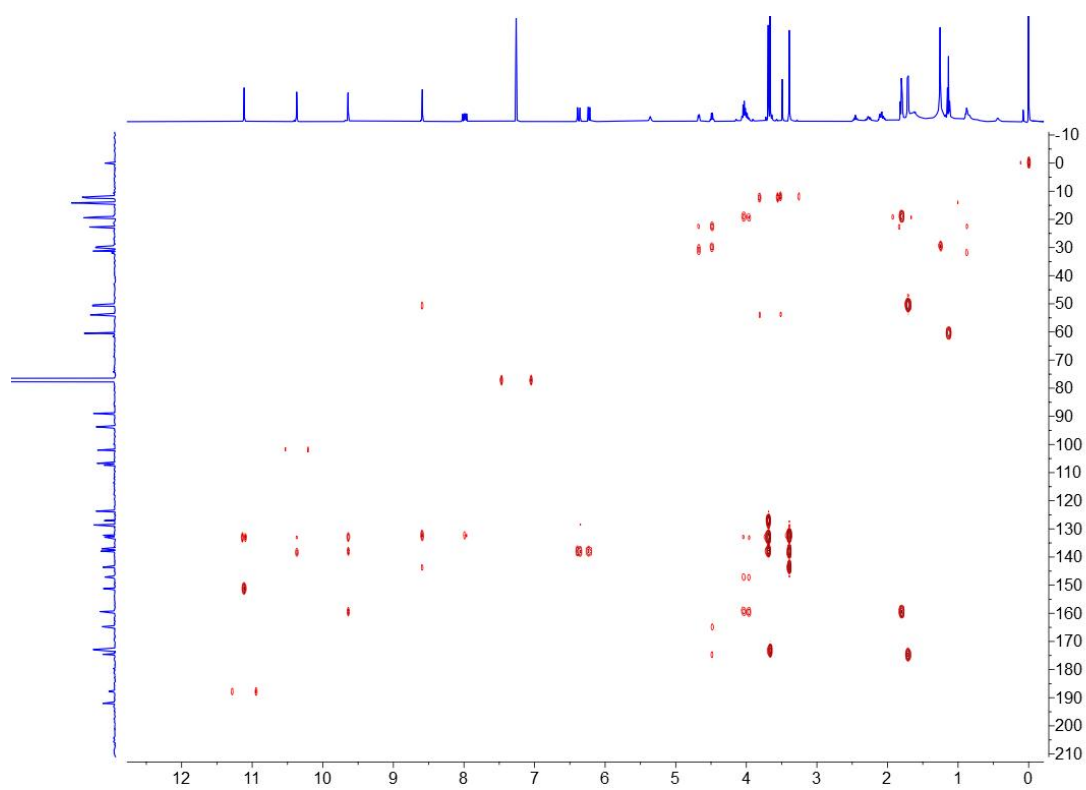

**Figure S8-7.** The HMBC spectrum of compound **8** (600/151 MHz,  $\text{CDCl}_3$ ).

9.

## Spectroscopic data for compound 9

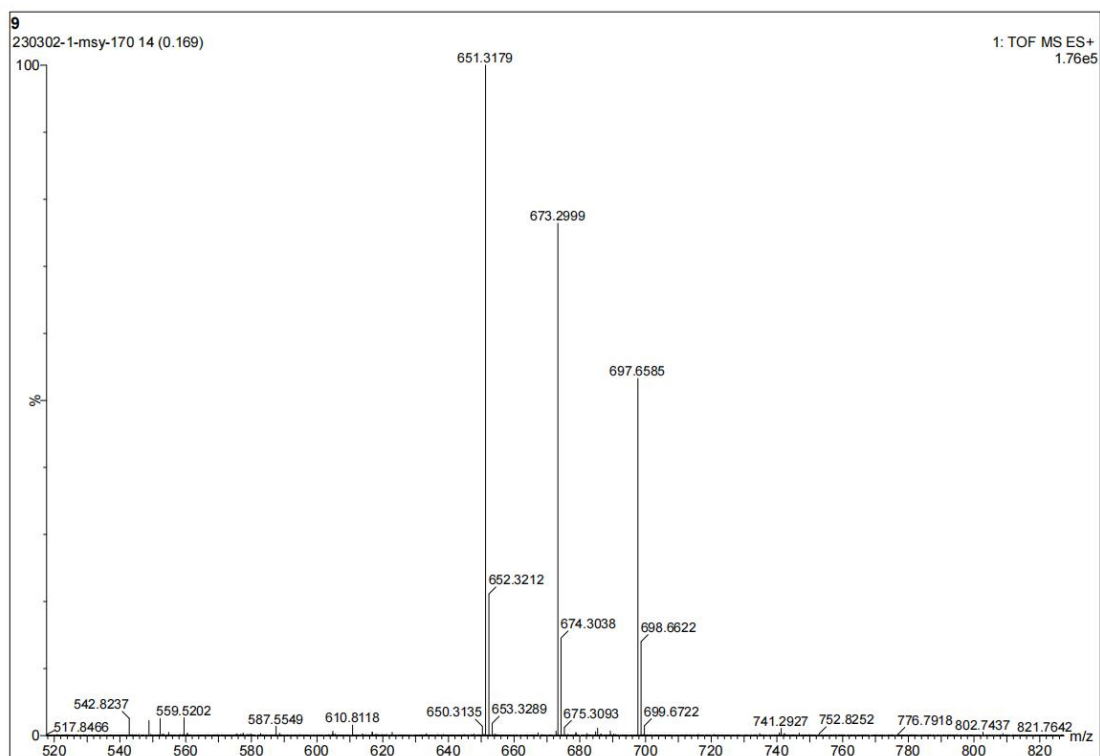

Figure S9-1. The HR-ESI-MS spectrum of compound 9.

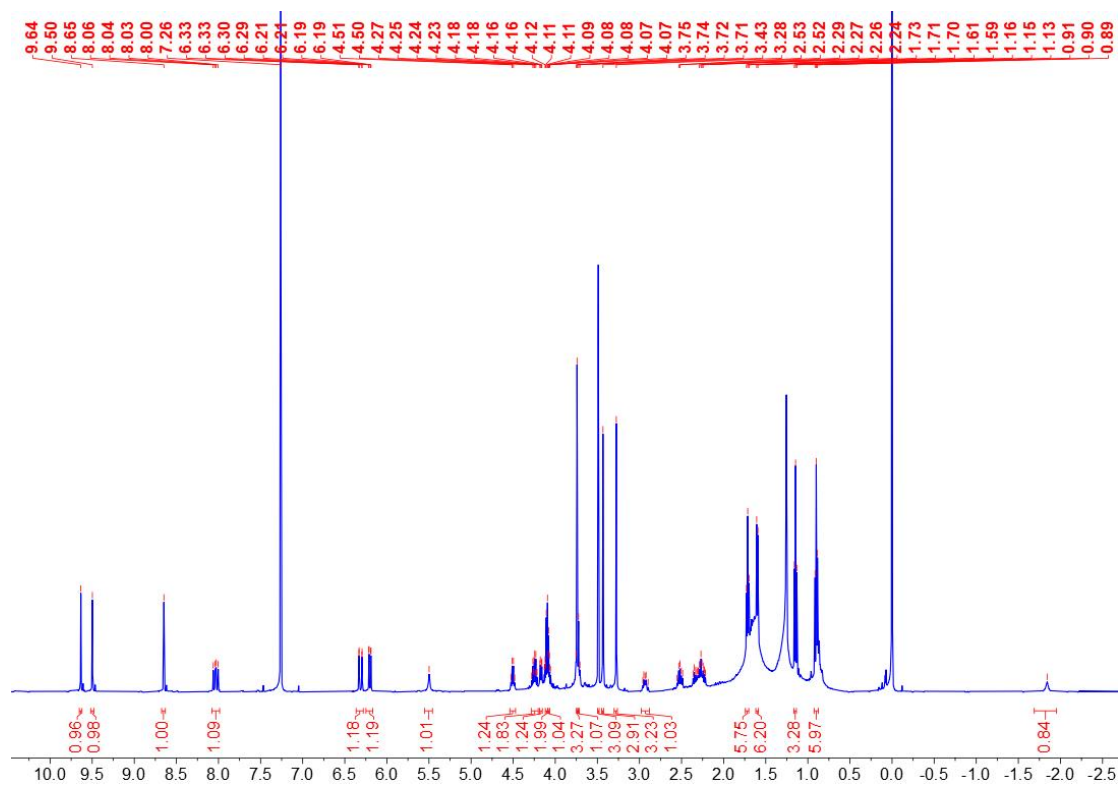

Figure S9-2. The  $^1\text{H}$  NMR spectrum of compound 9 (600 MHz,  $\text{CDCl}_3$ ).

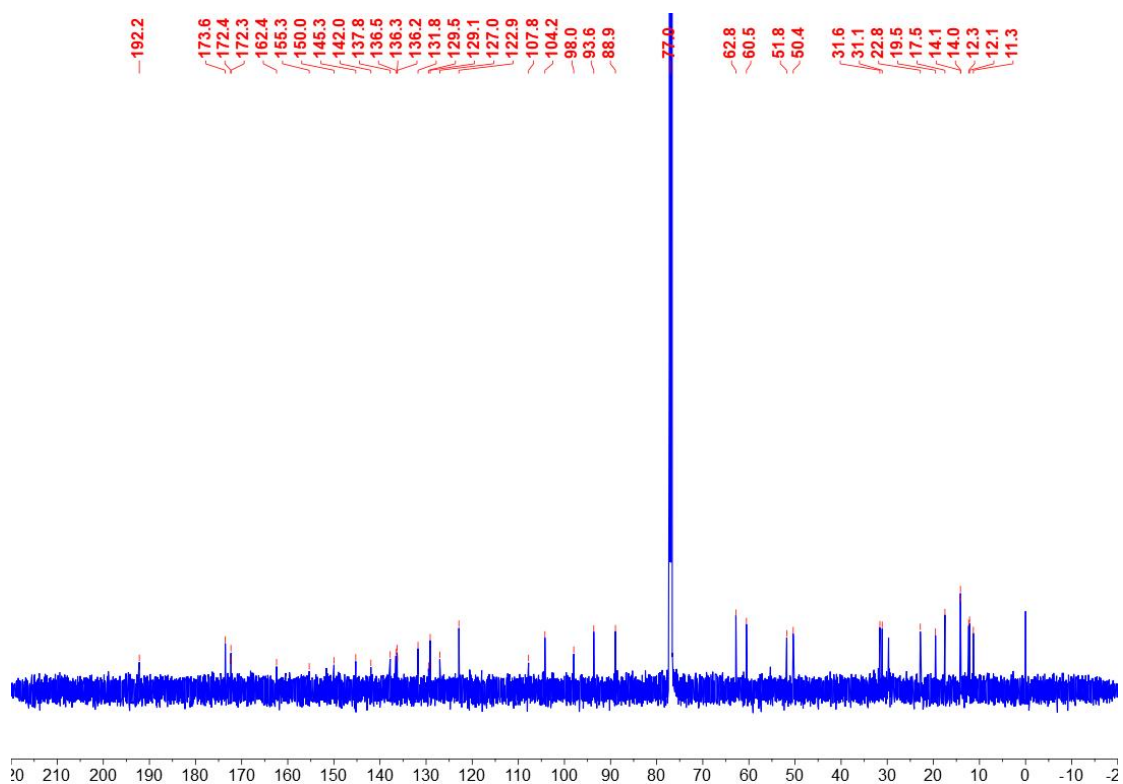

**Figure S9-3.** The  $^{13}\text{C}$  NMR spectrum of compound **9** (151 MHz,  $\text{CDCl}_3$ ).

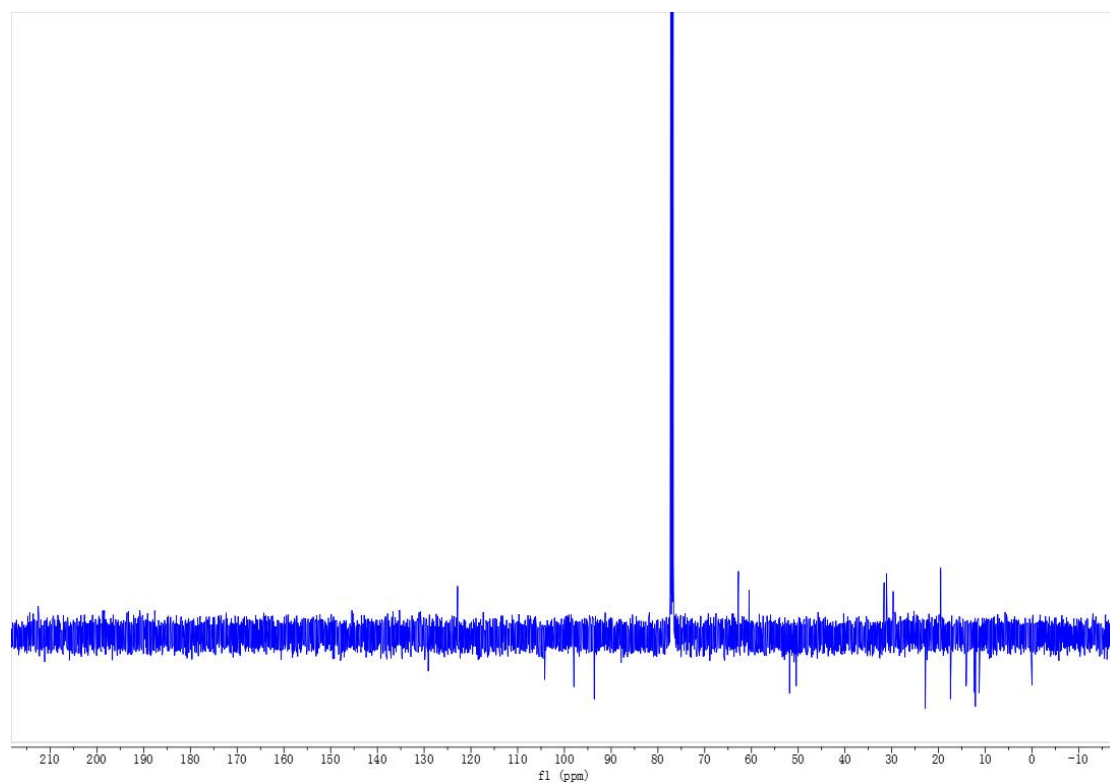

**Figure S9-4.** The DEPT 135 spectrum of compound **9** (151 MHz,  $\text{CDCl}_3$ ).

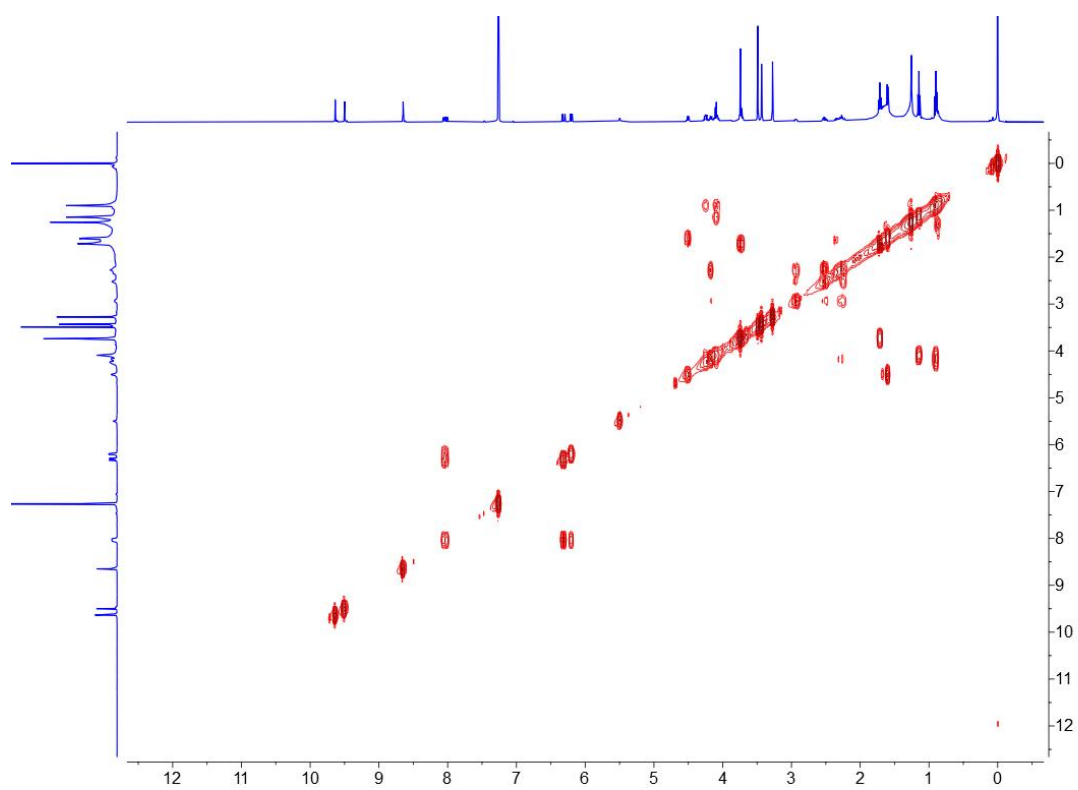

**Figure S9-5.** The  $^1\text{H}$ - $^1\text{H}$  COSY spectrum of compound **9** (600 MHz,  $\text{CDCl}_3$ ).

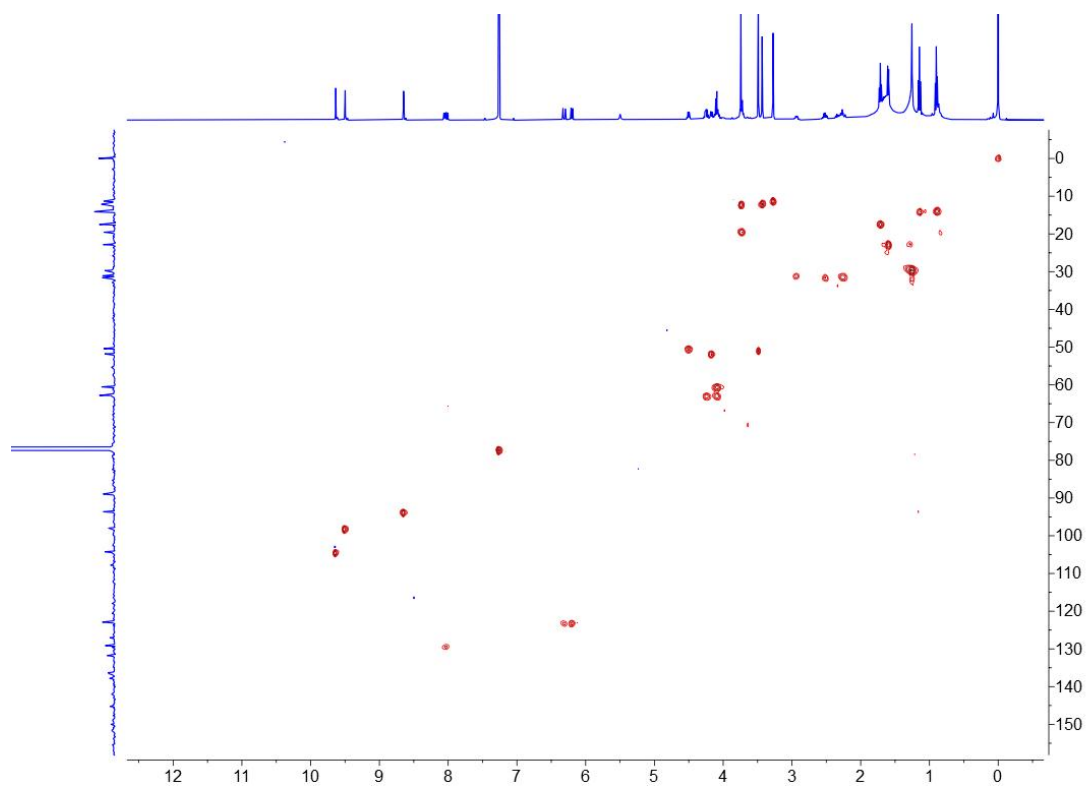

**Figure S9-6.** The HSQC spectrum of compound **9** (600/151 MHz,  $\text{CDCl}_3$ ).

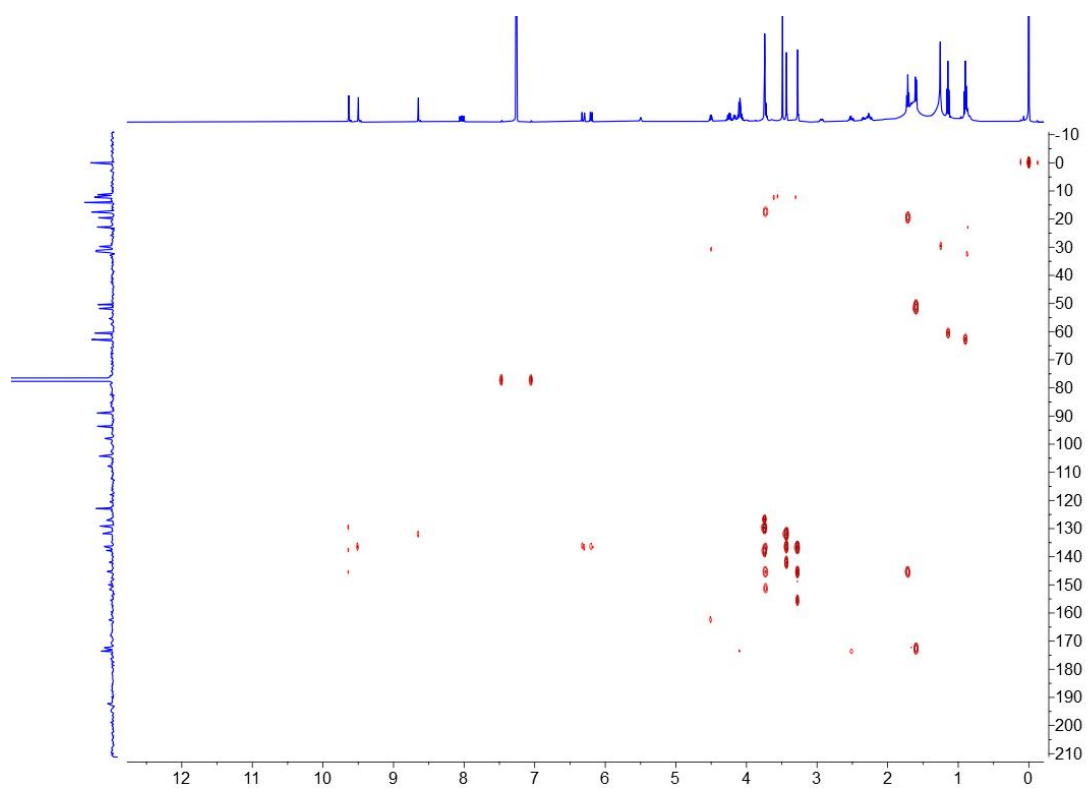

**Figure S9-7.** The HMBC spectrum of compound **9** (600/151 MHz,  $\text{CDCl}_3$ ).

10.

## Spectroscopic data for compound 10

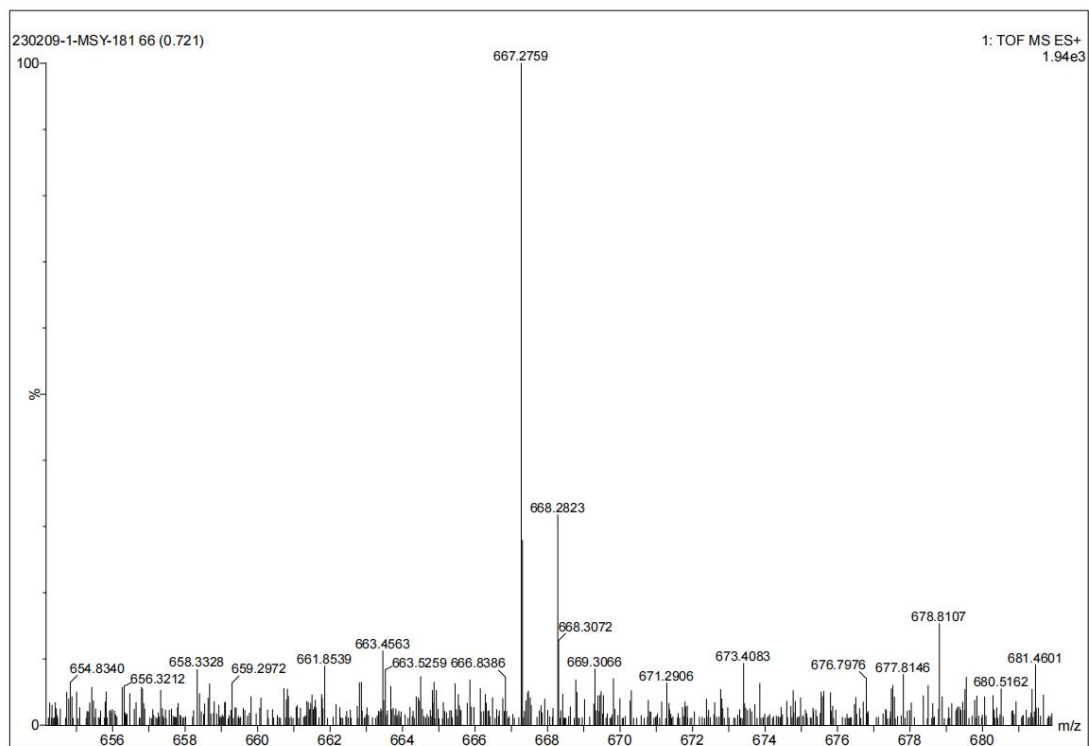

Figure S10-1. The HR-ESI-MS spectrum of compound 10.

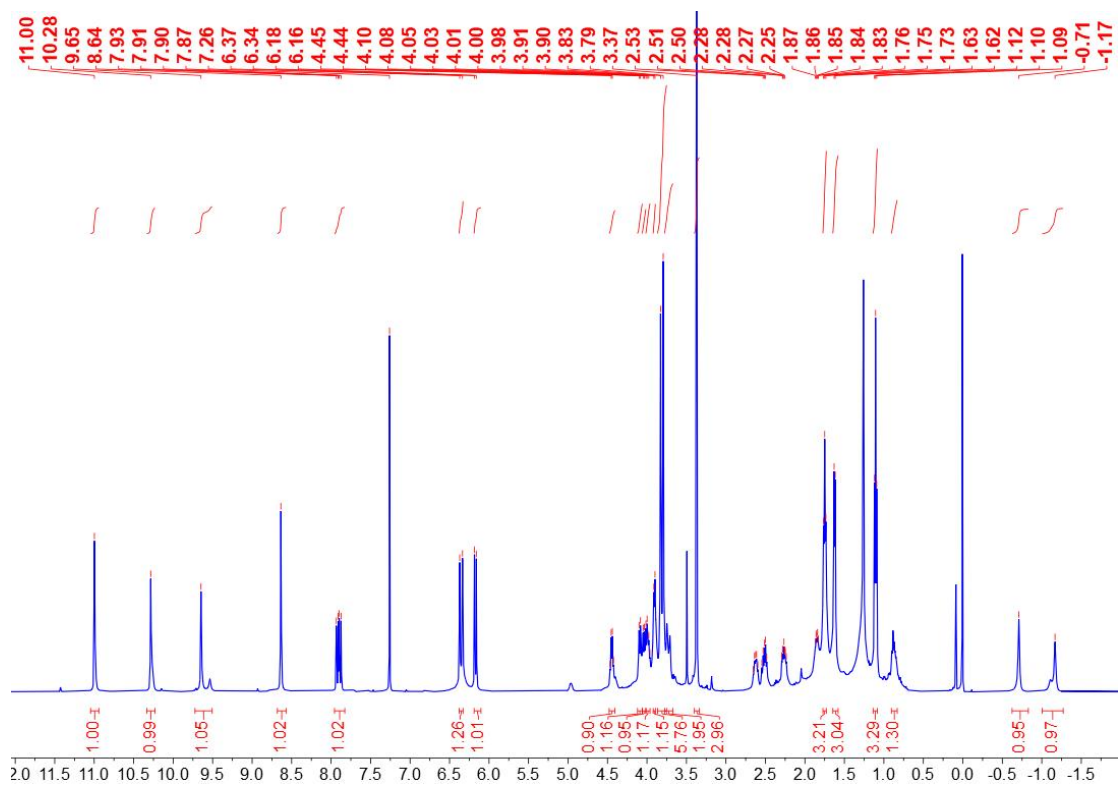

Figure S10-2. The  $^1\text{H}$  NMR spectrum of compound 10 (600 MHz,  $\text{CDCl}_3$ ).

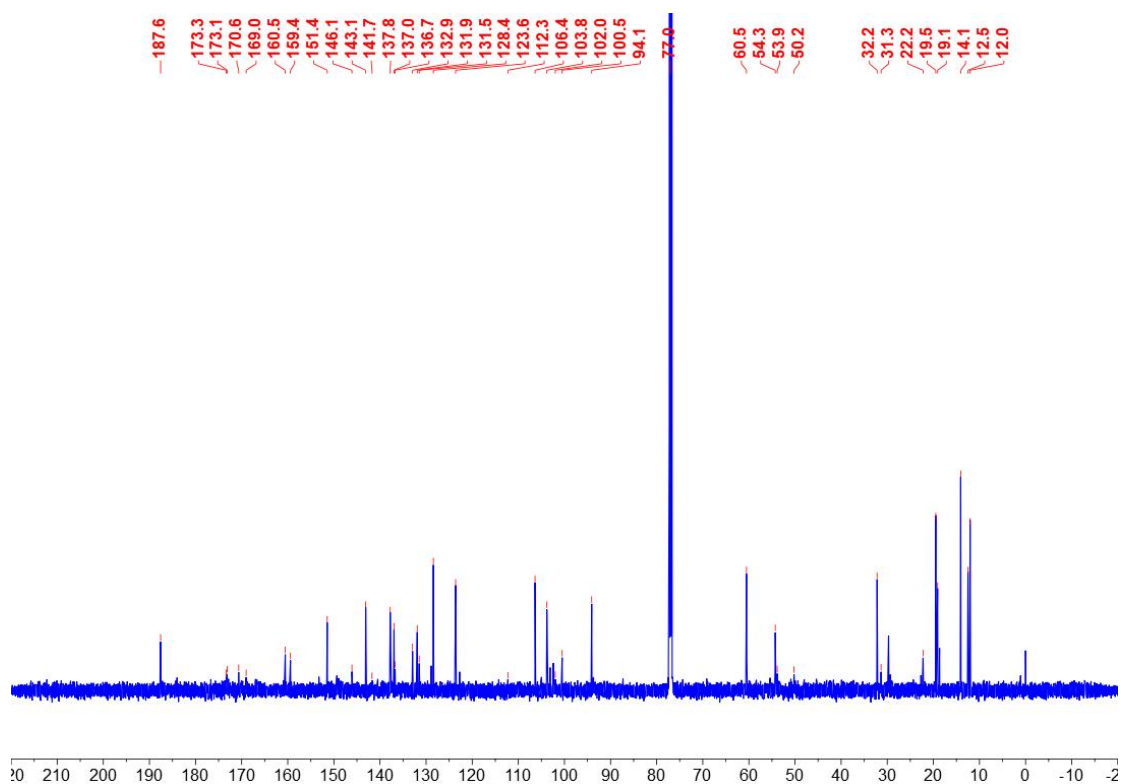

**Figure S10-3.** The  $^{13}\text{C}$  NMR spectrum of compound **10** (151 MHz,  $\text{CDCl}_3$ ).

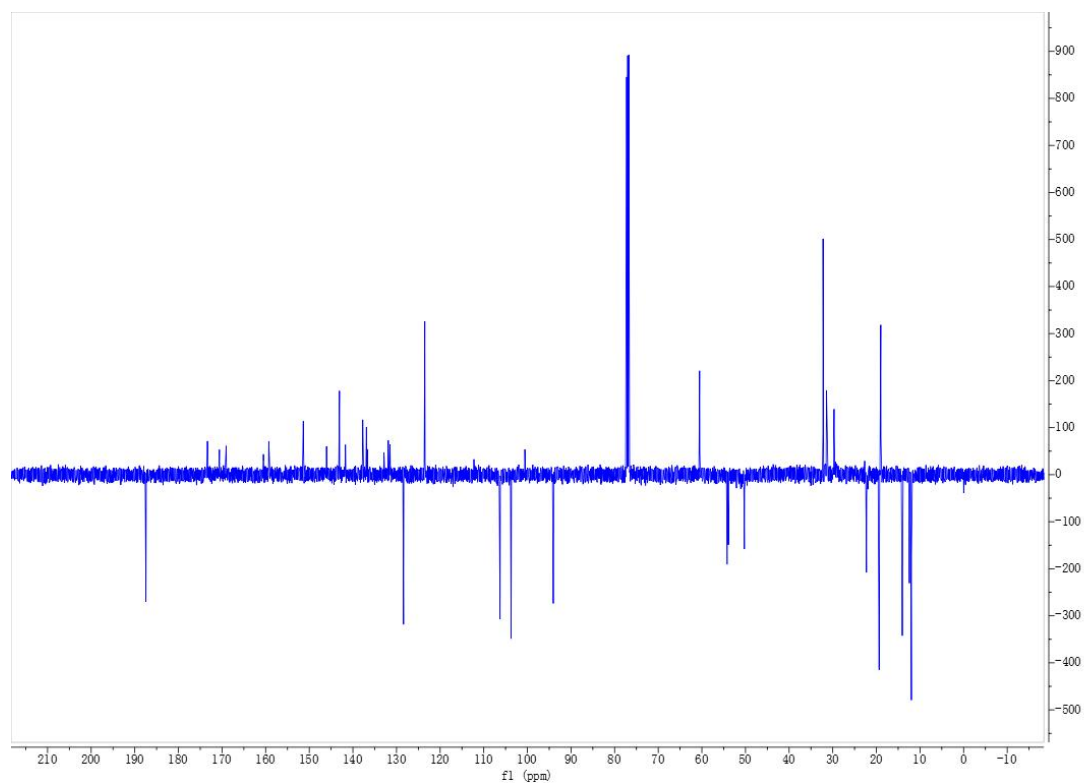

**Figure S10-4.** The DEPT 135 spectrum of compound **10** (151 MHz,  $\text{CDCl}_3$ ).



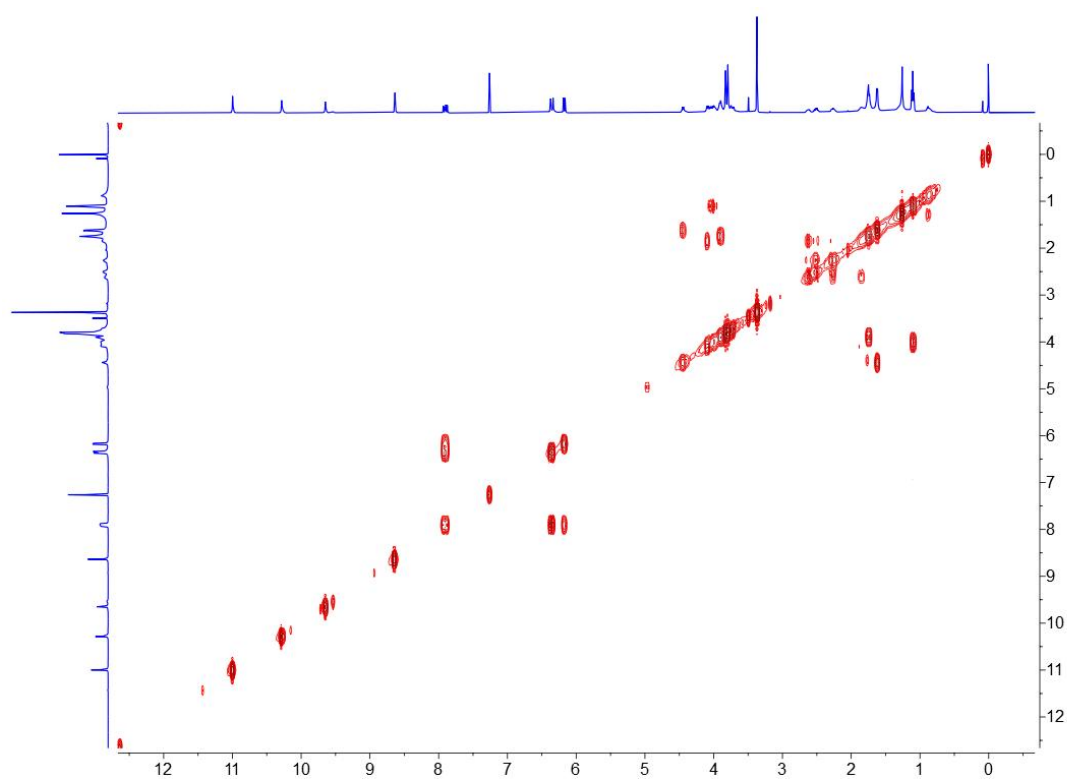

**Figure S10-5.** The  $^1\text{H}$ - $^1\text{H}$  COSY spectrum of compound **10** (600 MHz,  $\text{CDCl}_3$ ).

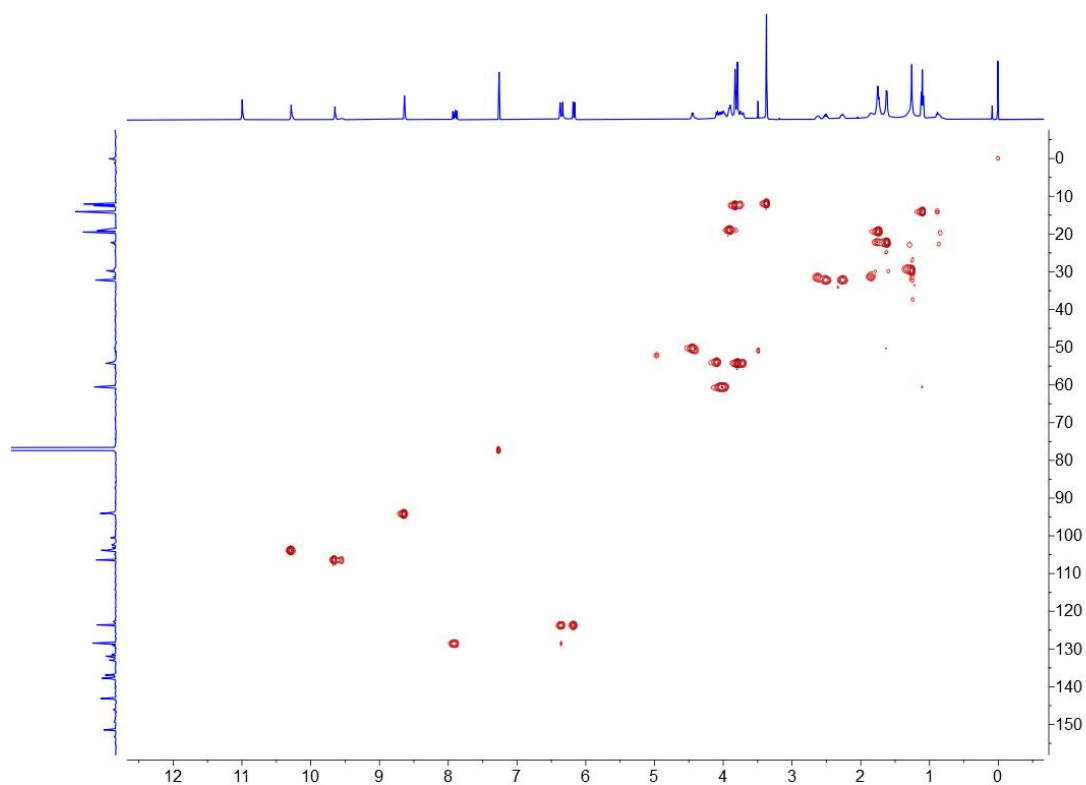

**Figure S10-6.** The HSQC spectrum of compound **10** (600/151 MHz,  $\text{CDCl}_3$ ).

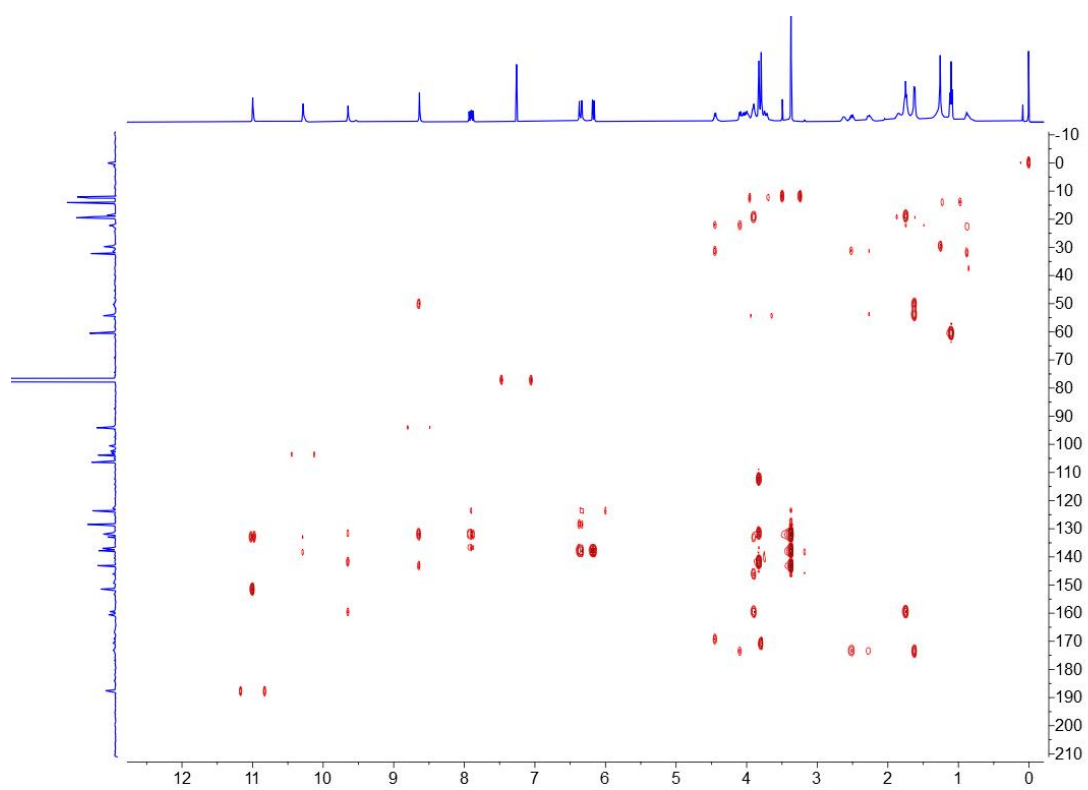

**Figure S10-7.** The HMBC spectrum of compound **10** (600/151 MHz,  $\text{CDCl}_3$ ).

## 11. The scheme of extraction and isolation

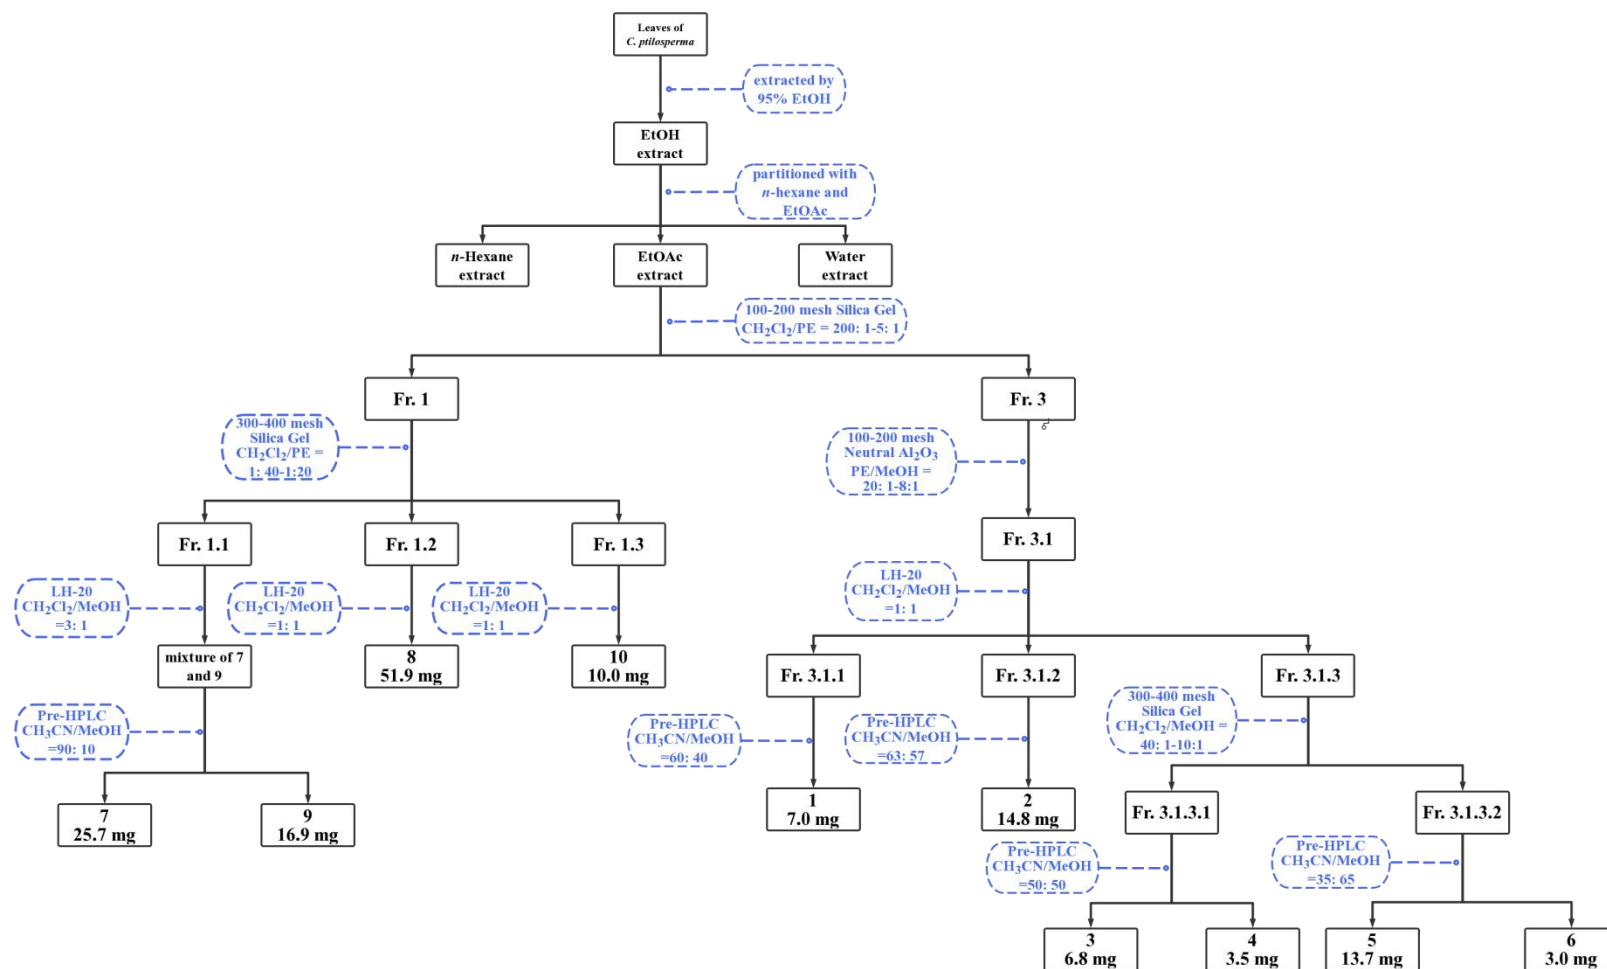

Figure S11. The scheme of extraction and isolation.
